# Supplementary material for: Synthesis and Characterization of Novel 2-(1,2,3-Triazol-4-yl)-4,5-dihydro-1H-pyrazol-1-yl)thiazoles and 2-(4,5-Dihydro-1H-pyrazol-1-yl)-4-(1H-1,2,3-triazol-4-yl)thiazoles
Source: MDPI journal article supplement (doi:10.3390/molecules27248904), 2022-12-14
Supplement: s1 [file s1]

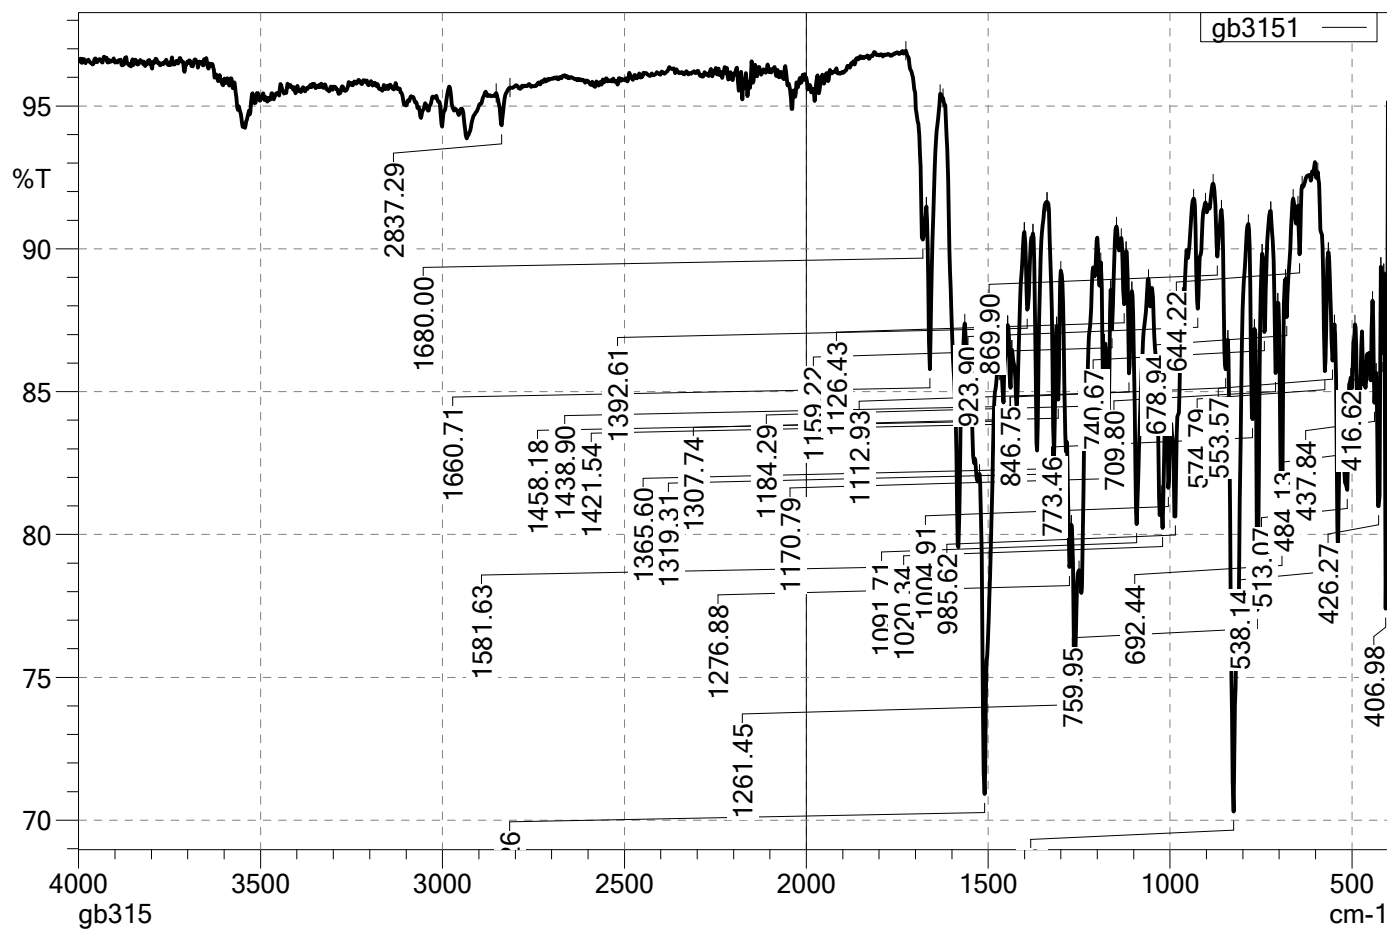

C:\Users\Shimadzu\Desktop\BK\071222\gb3151.ispd

gb315

|    | Item           | Value          |
|----|----------------|----------------|
| 2  | Sample name    | IH_006         |
| 3  | Sample ID      | IH_006         |
| 4  | Option         | IH_006         |
| 5  | Intensity Mode | %Transmittance |
| 6  | Apodization    | Happ-Genzel    |
| 9  | No. of Scans   | 16             |
| 10 | Resolution     | 4 cm-1         |

| No. | Peak   | Intensity | Corr. Intensity | Base (H) | Base (L) | Area    | Corr. Area | Comment |
|-----|--------|-----------|-----------------|----------|----------|---------|------------|---------|
| 1   | 406.98 | 77.41     | 14.74           | 412.77   | 401.19   | 180.638 | 89.719     |         |
| 2   | 416.62 | 86.36     | 2.90            | 420.48   | 412.77   | 96.391  | 13.501     |         |
| 3   | 426.27 | 80.99     | 6.79            | 433.98   | 420.48   | 221.119 | 52.504     |         |
| 4   | 437.84 | 84.61     | 2.06            | 443.63   | 433.98   | 135.622 | 9.467      |         |
| 5   | 484.13 | 83.50     | 2.45            | 491.85   | 480.28   | 168.480 | 9.937      |         |
| 6   | 513.07 | 81.56     | 3.54            | 528.50   | 503.42   | 425.358 | 48.719     |         |
| 7   | 538.14 | 79.39     | 6.53            | 547.78   | 528.50   | 320.674 | 48.971     |         |
| 8   | 553.57 | 86.09     | 2.11            | 565.14   | 547.78   | 212.256 | 14.771     |         |
| 9   | 574.79 | 85.72     | 5.10            | 594.08   | 565.14   | 304.050 | 52.020     |         |
| 10  | 644.22 | 89.81     | 1.94            | 648.08   | 636.51   | 103.880 | 9.722      |         |
| 11  | 678.94 | 87.62     | 1.84            | 682.80   | 661.58   | 220.278 | 15.551     |         |
| 12  | 692.44 | 79.57     | 9.01            | 704.02   | 682.80   | 312.924 | 69.649     |         |
| 13  | 709.80 | 85.65     | 3.43            | 723.31   | 704.02   | 221.605 | 23.350     |         |

|    |         |       |       |         |         |          |         |  |
|----|---------|-------|-------|---------|---------|----------|---------|--|
| 14 | 740.67  | 87.09 | 3.11  | 746.45  | 723.31  | 240.625  | 22.491  |  |
| 15 | 759.95  | 77.36 | 10.80 | 767.67  | 746.45  | 326.681  | 82.944  |  |
| 16 | 773.46  | 84.03 | 4.39  | 785.03  | 767.67  | 222.372  | 32.043  |  |
| 17 | 825.53  | 70.30 | 10.42 | 840.96  | 815.89  | 583.831  | 128.921 |  |
| 18 | 846.75  | 85.79 | 2.54  | 858.32  | 840.96  | 214.880  | 25.462  |  |
| 19 | 869.90  | 89.73 | 2.09  | 881.47  | 858.32  | 209.053  | 19.854  |  |
| 20 | 923.90  | 87.90 | 3.82  | 935.48  | 902.69  | 320.890  | 48.513  |  |
| 21 | 985.62  | 80.63 | 4.91  | 997.20  | 966.34  | 493.314  | 64.290  |  |
| 22 | 1004.91 | 81.63 | 3.00  | 1010.70 | 997.20  | 225.251  | 16.503  |  |
| 23 | 1020.34 | 80.23 | 2.24  | 1024.20 | 1010.70 | 237.257  | 11.657  |  |
| 24 | 1091.71 | 80.36 | 8.28  | 1105.21 | 1058.92 | 670.989  | 149.343 |  |
| 25 | 1112.93 | 85.63 | 3.58  | 1120.64 | 1105.21 | 188.774  | 22.390  |  |
| 26 | 1126.43 | 88.05 | 2.06  | 1134.14 | 1120.64 | 146.309  | 13.290  |  |
| 27 | 1159.22 | 87.19 | 1.93  | 1163.08 | 1147.65 | 169.574  | 10.221  |  |
| 28 | 1170.79 | 82.61 | 5.12  | 1180.44 | 1163.08 | 250.331  | 35.453  |  |
| 29 | 1184.29 | 85.16 | 2.66  | 1190.08 | 1180.44 | 126.678  | 11.957  |  |
| 30 | 1261.45 | 74.69 | 4.93  | 1271.09 | 1249.87 | 473.359  | 39.335  |  |
| 31 | 1276.88 | 78.86 | 2.72  | 1284.59 | 1271.09 | 262.206  | 16.374  |  |
| 32 | 1307.74 | 84.72 | 3.22  | 1311.59 | 1300.02 | 152.553  | 16.702  |  |
| 33 | 1319.31 | 82.77 | 5.76  | 1338.60 | 1311.59 | 329.237  | 44.785  |  |
| 34 | 1365.60 | 82.94 | 7.93  | 1377.17 | 1338.60 | 434.569  | 90.878  |  |
| 35 | 1392.61 | 87.87 | 2.70  | 1400.32 | 1377.17 | 245.486  | 27.094  |  |
| 36 | 1421.54 | 84.52 | 3.55  | 1435.04 | 1400.32 | 445.529  | 47.308  |  |
| 37 | 1438.90 | 85.13 | 1.62  | 1446.61 | 1435.04 | 158.770  | 7.178   |  |
| 38 | 1458.18 | 84.62 | 1.92  | 1469.76 | 1446.61 | 327.709  | 16.160  |  |
| 39 | 1510.26 | 70.92 | 12.19 | 1523.76 | 1475.54 | 1015.739 | 238.873 |  |
| 40 | 1581.63 | 79.56 | 10.11 | 1624.06 | 1564.27 | 752.568  | 233.960 |  |
| 41 | 1660.71 | 85.79 | 6.67  | 1670.35 | 1631.78 | 333.546  | 80.757  |  |
| 42 | 1680.00 | 90.32 | 2.09  | 1726.29 | 1670.35 | 320.630  | -3.615  |  |
| 43 | 2837.29 | 94.32 | 1.21  | 2852.72 | 2814.14 | 186.930  | 15.320  |  |
