# Supplementary material for: Synthesis and Characterization of Novel 2-(1,2,3-Triazol-4-yl)-4,5-dihydro-1H-pyrazol-1-yl)thiazoles and 2-(4,5-Dihydro-1H-pyrazol-1-yl)-4-(1H-1,2,3-triazol-4-yl)thiazoles
Source: MDPI journal article supplement (doi:10.3390/molecules27248904), 2022-12-14
Supplement: s1 [file s1]

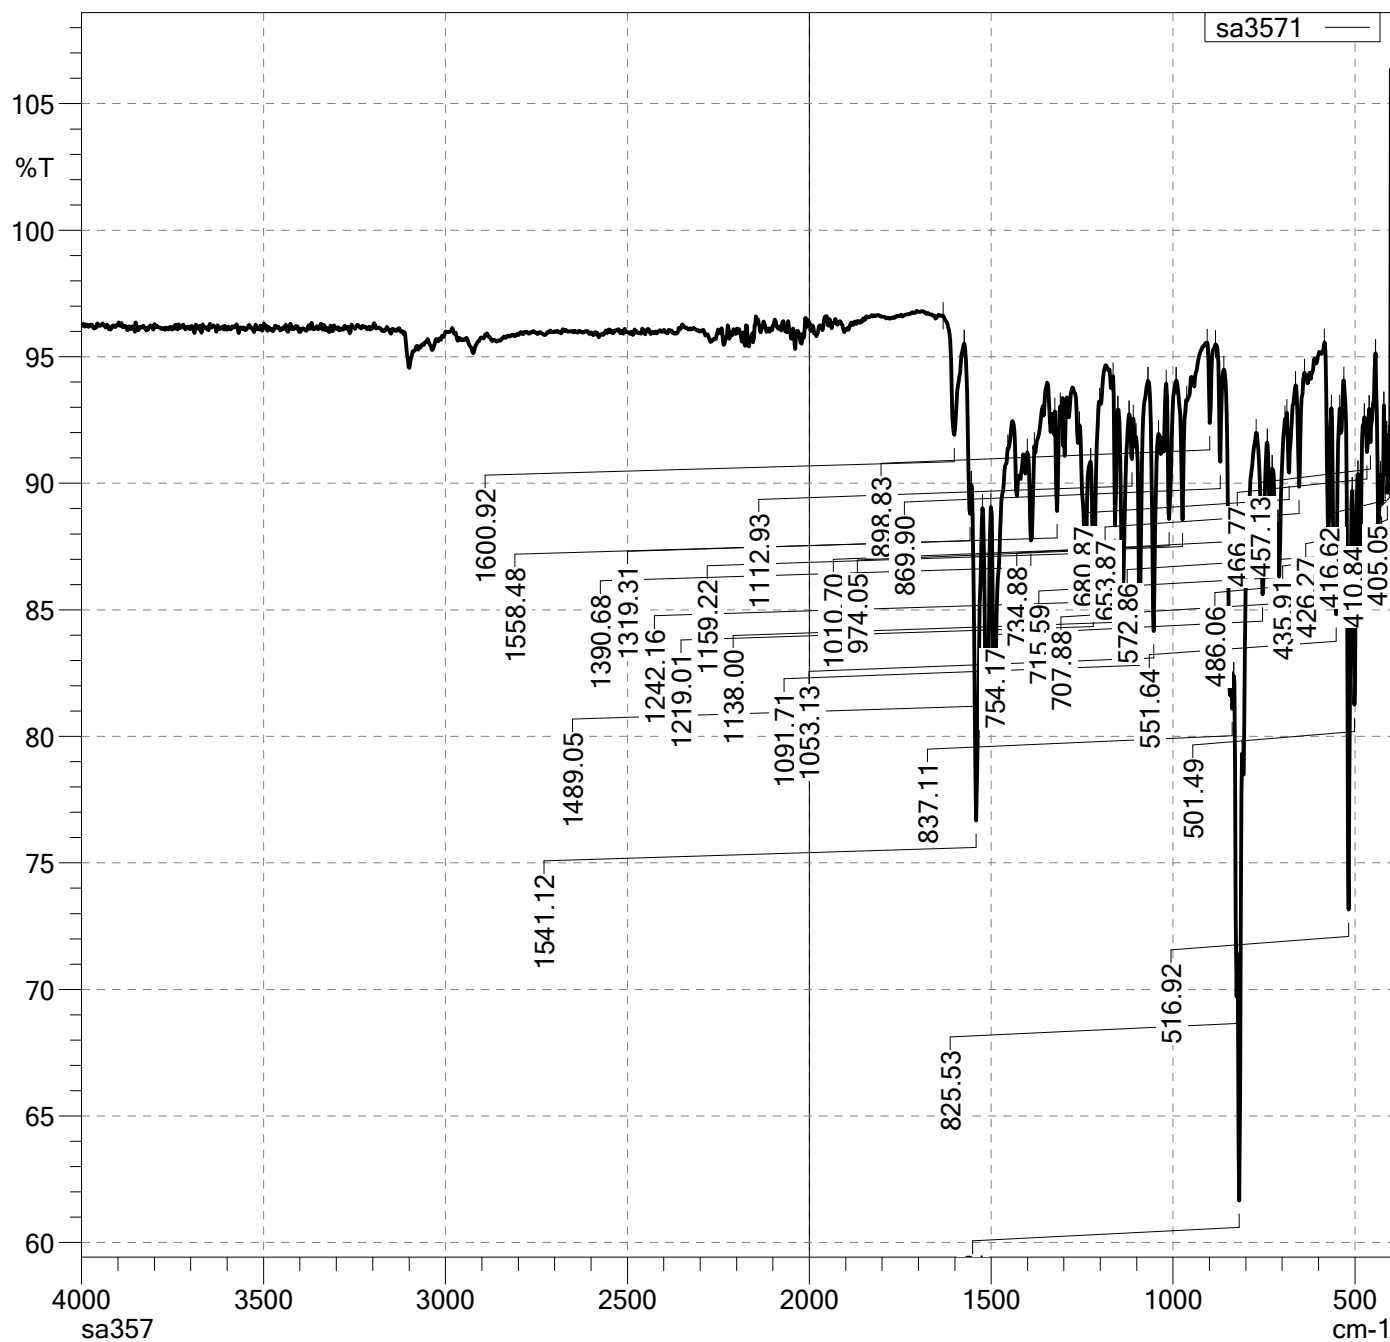

C:\Users\Shimadzu\Desktop\BK\071222\sa3571.ispd

sa357

|   | Item           | Value          |
|---|----------------|----------------|
| 2 | Sample name    | IH_006         |
| 3 | Sample ID      | IH_006         |
| 4 | Option         | IH_006         |
| 5 | Intensity Mode | %Transmittance |
| 6 | Apodization    | Happ-Genzel    |
| 9 | No. of Scans   | 16             |

|    |            |                    |
|----|------------|--------------------|
| 10 | Resolution | 4 cm <sup>-1</sup> |
|----|------------|--------------------|
