# Supplementary figures and images for: Synthesis and Characterization of Novel 2-(1,2,3-Triazol-4-yl)-4,5-dihydro-1H-pyrazol-1-yl)thiazoles and 2-(4,5-Dihydro-1H-pyrazol-1-yl)-4-(1H-1,2,3-triazol-4-yl)thiazoles
Source: MDPI journal article supplement (doi:10.3390/molecules27248904), 2022-12-14

SA356-DMSO-13C-4.jdf  
SA356-DMSO-13C

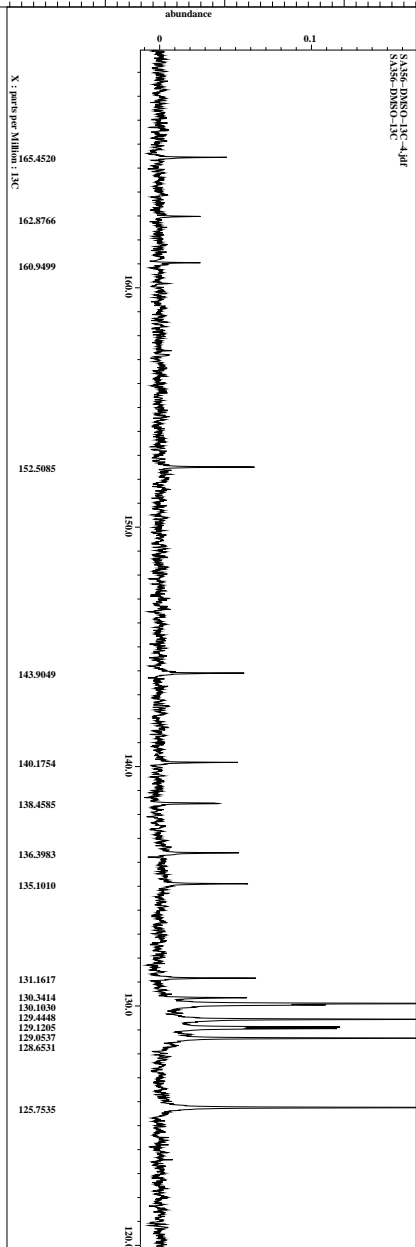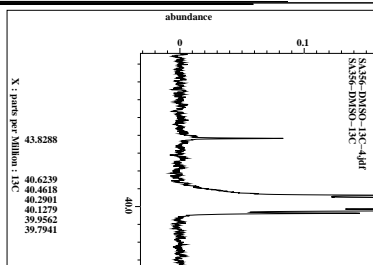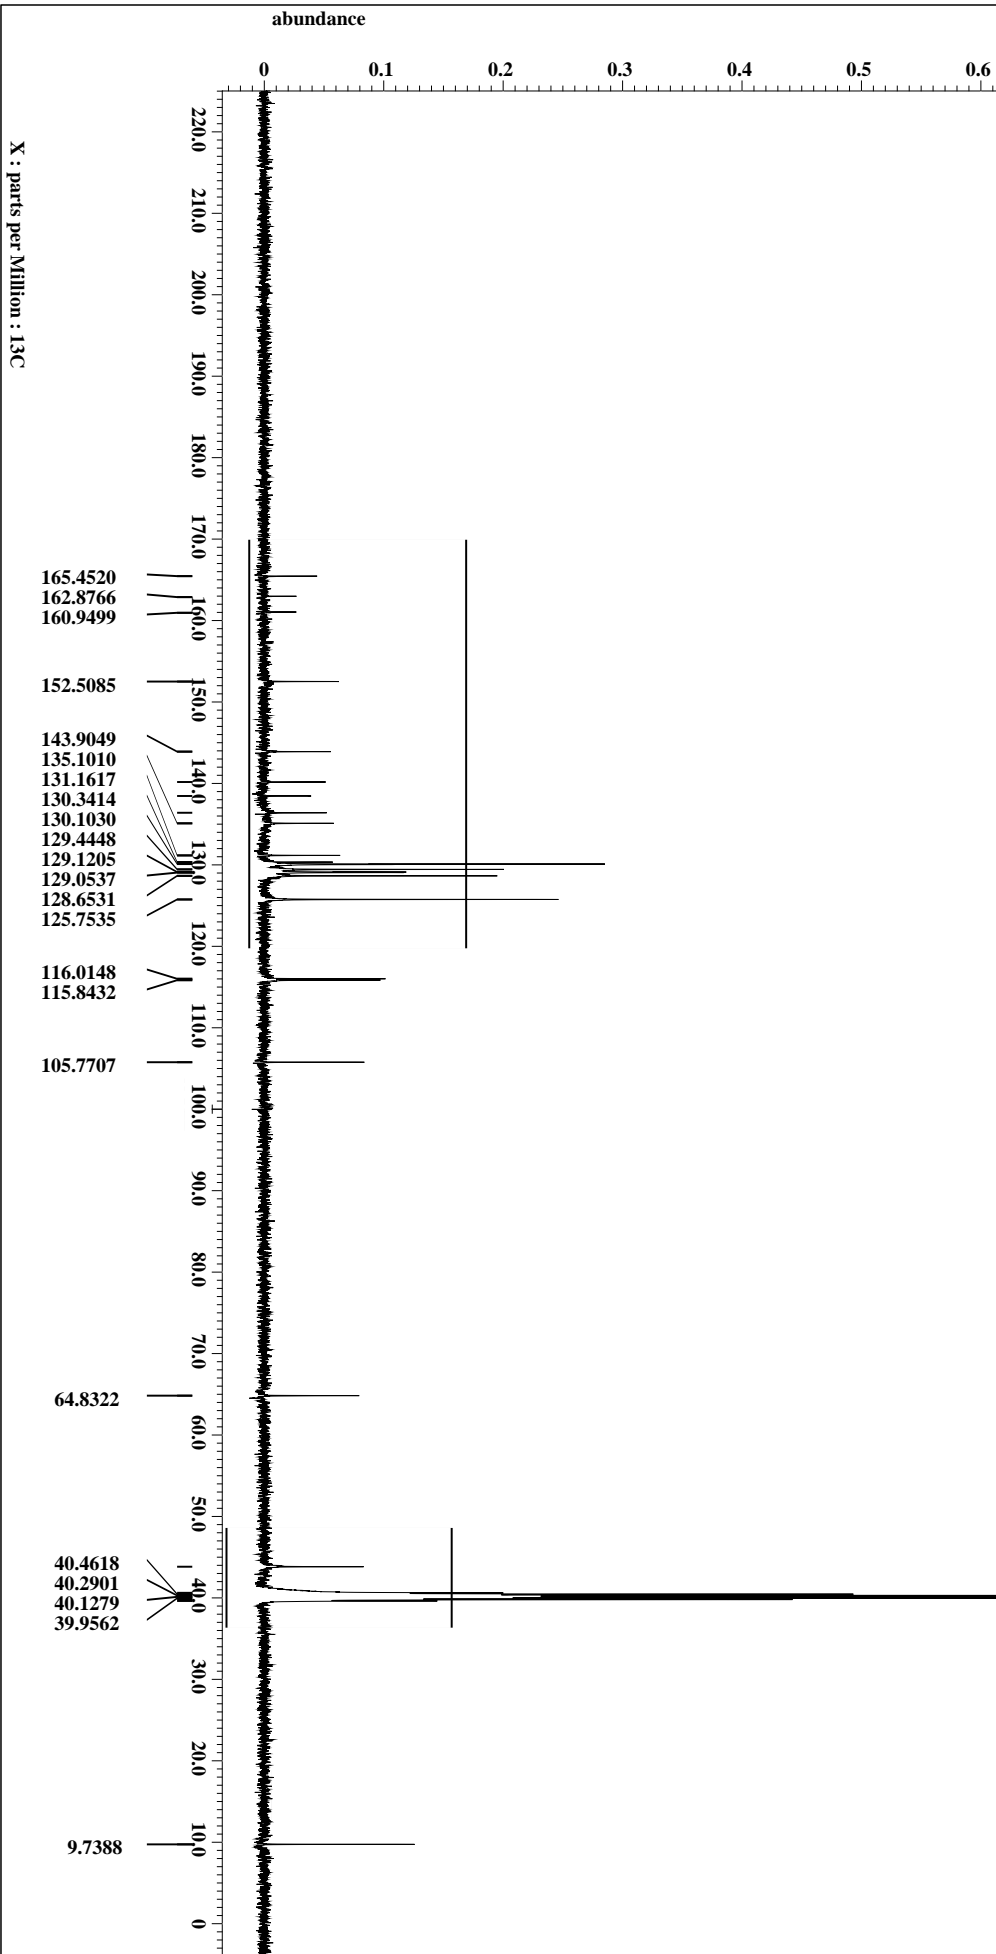

Supplement: s1 [file s1]

X : parts per Million : 1H

7.8458  
7.8058  
7.7638  
7.7467  
7.6361  
7.6284  
7.6208  
7.0087  
6.9916

3.7921  
3.4098  
3.3087

2.5594  
2.4679

1.0235

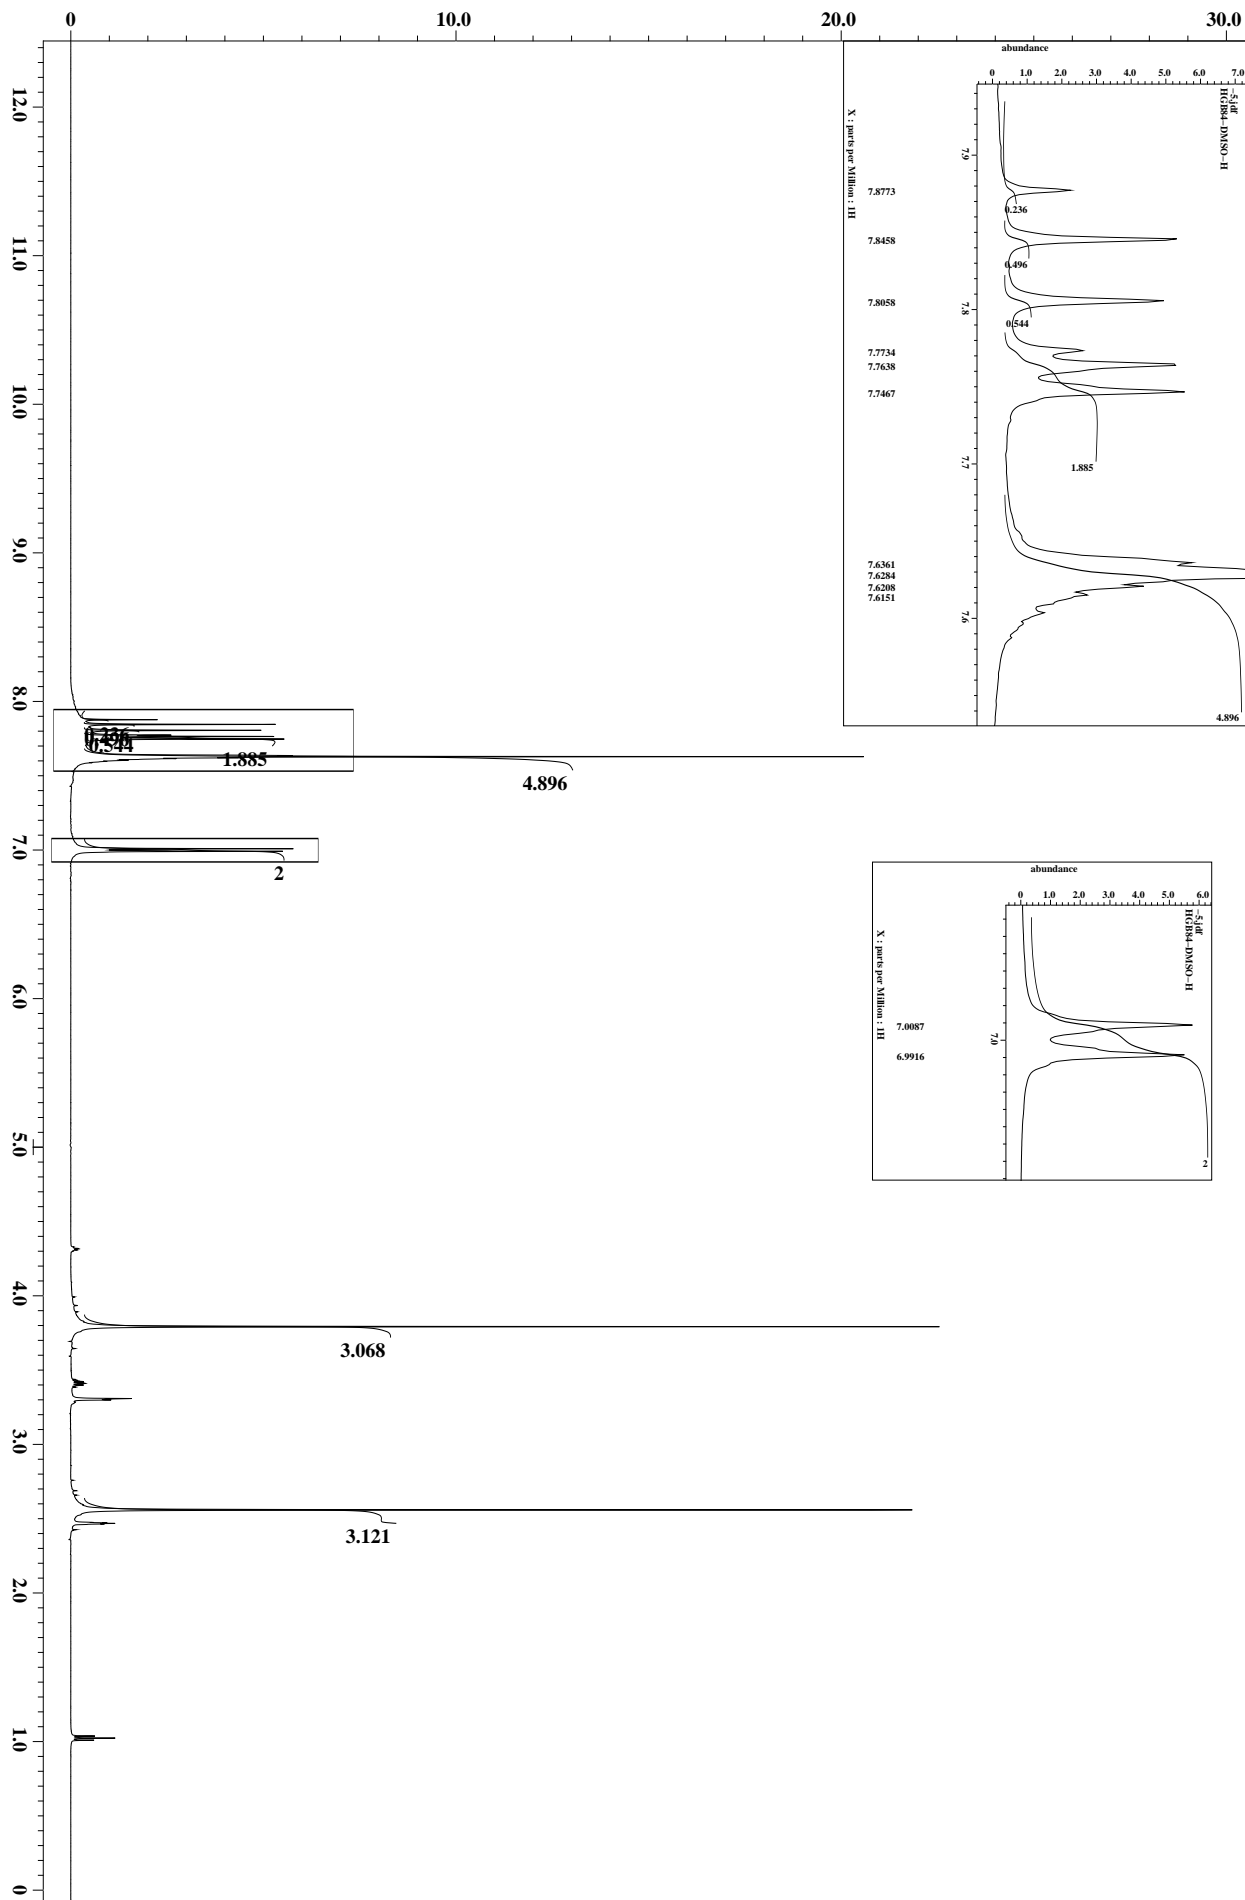

-51df  
HGB84-DMSO-H

Supplement: s1 [file s1]

GB310-DMSO-H-5.jdf  
GB310-DMSO-H

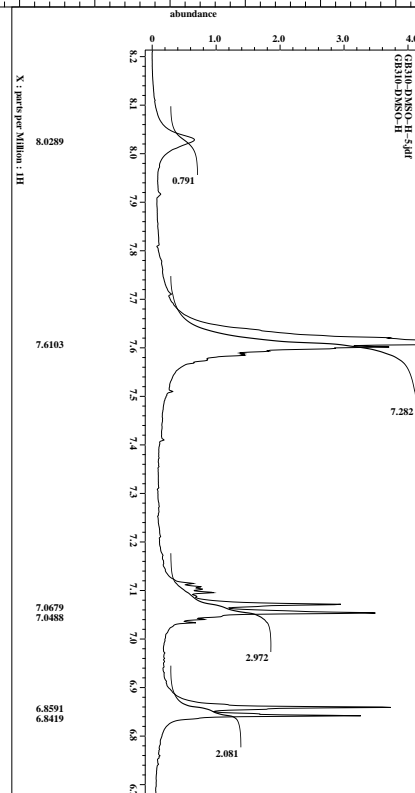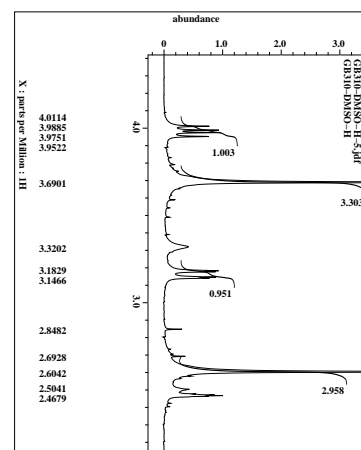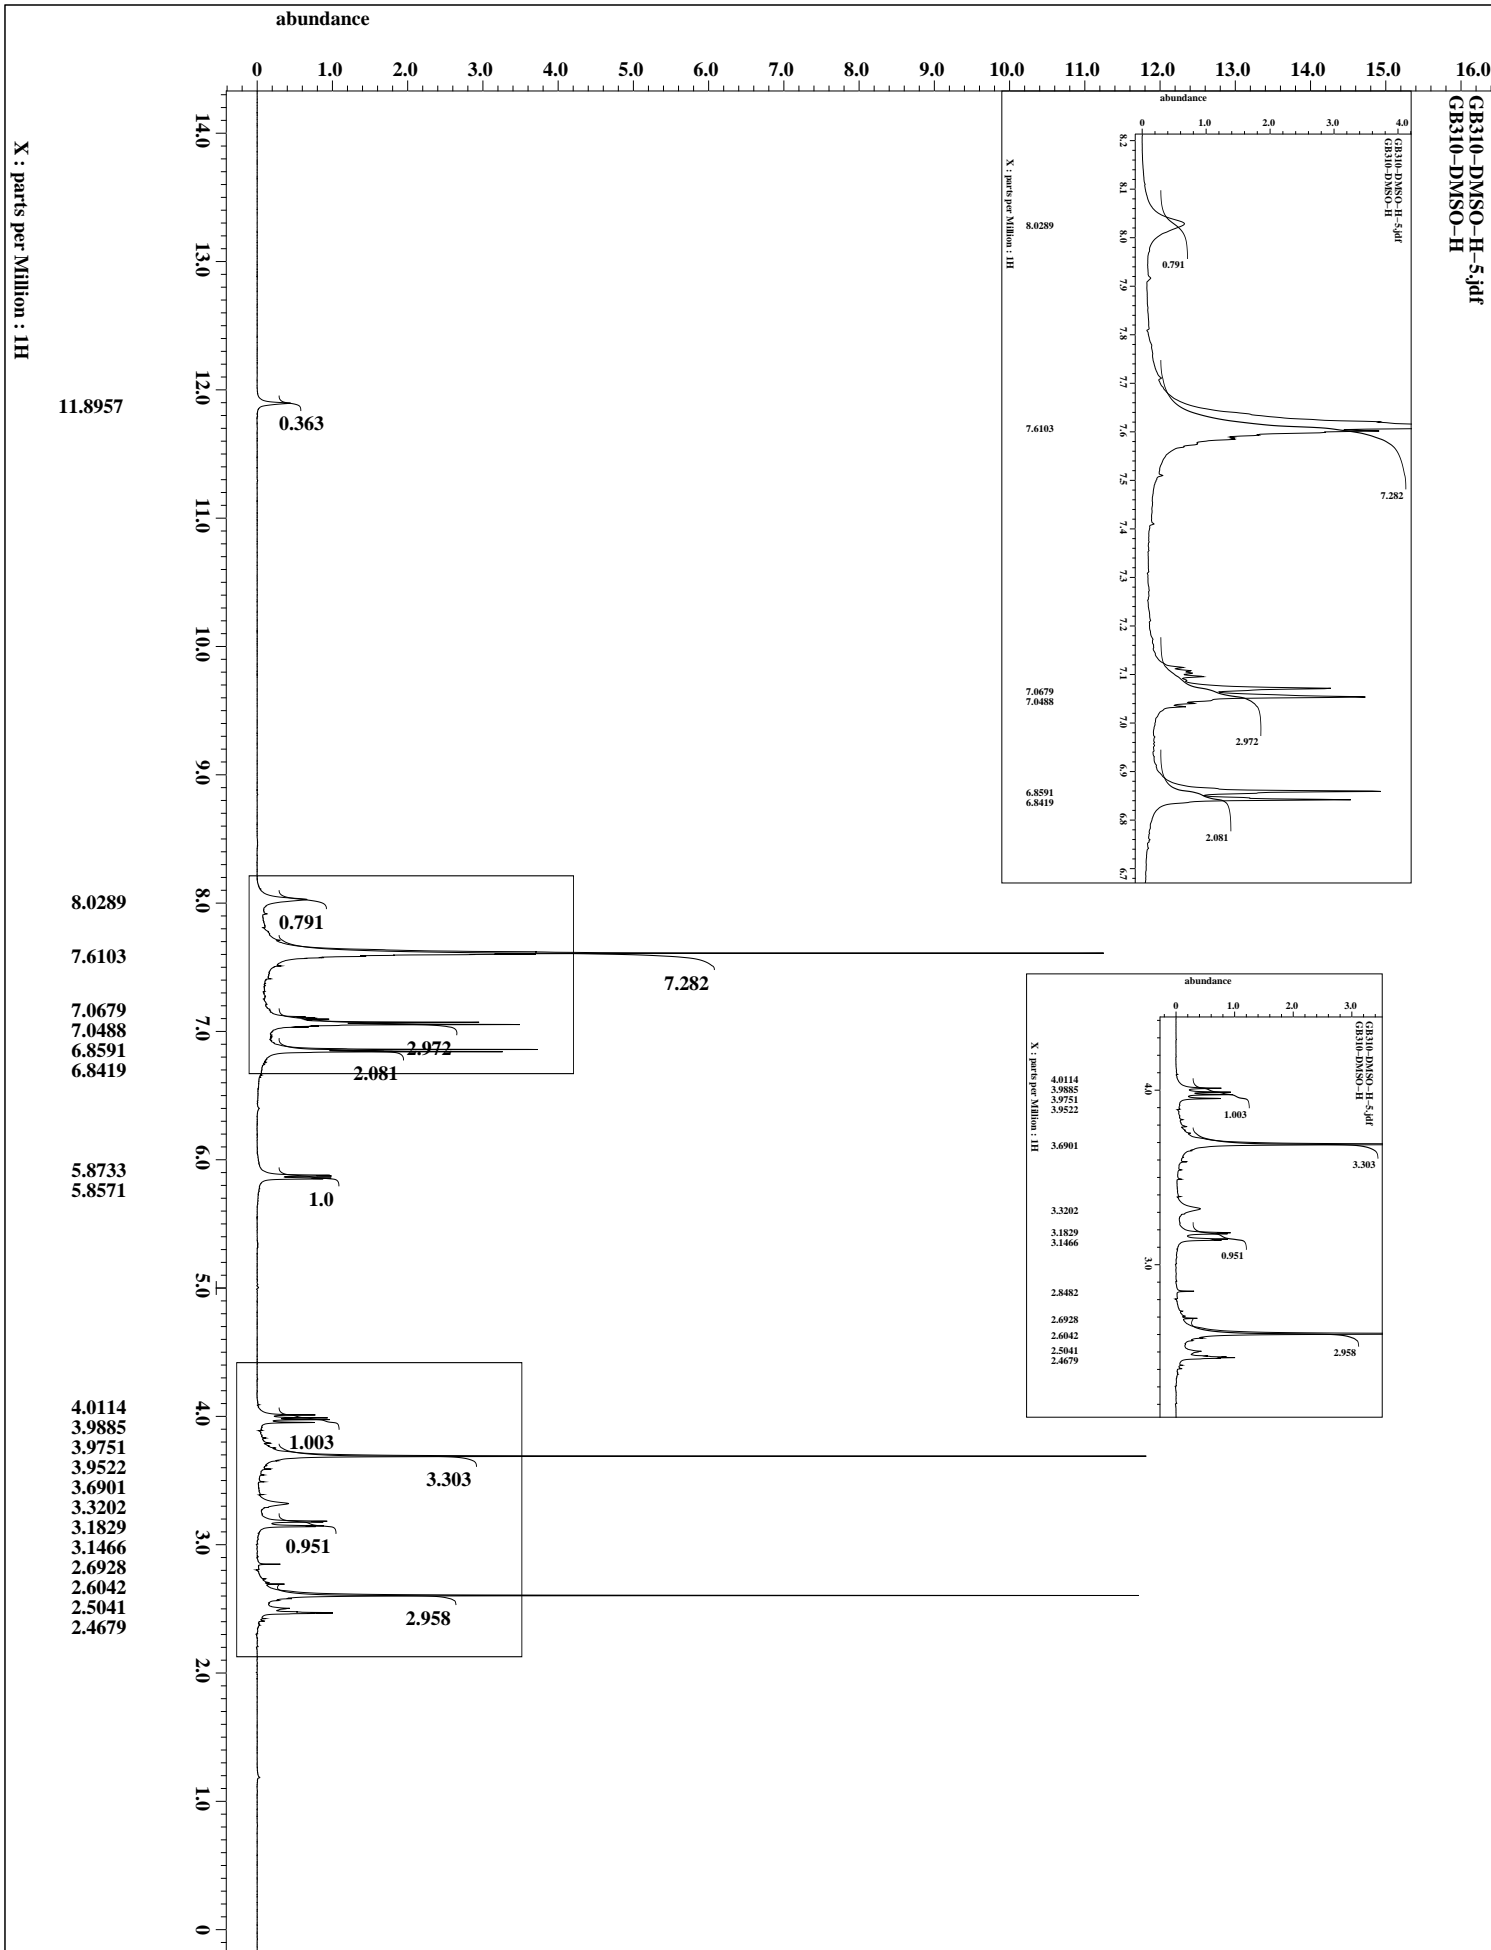

Supplement: s1 [file s1]

SA357-DMSO-1H-5Jdf  
SA357-DMSO-1H

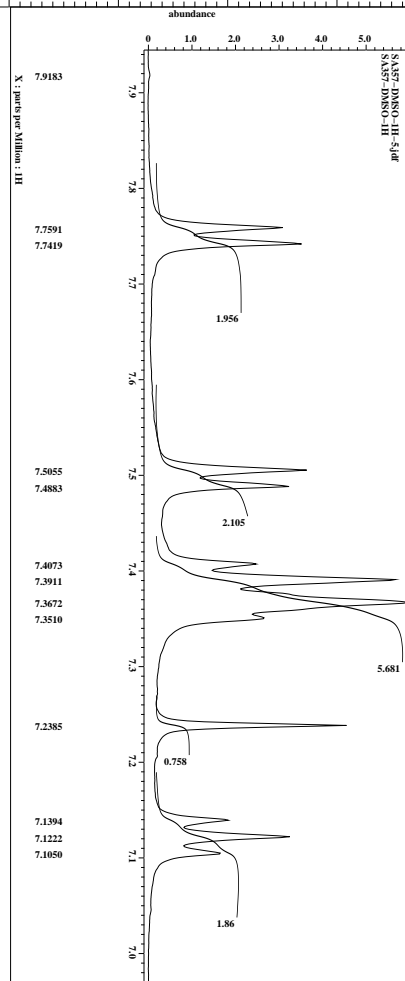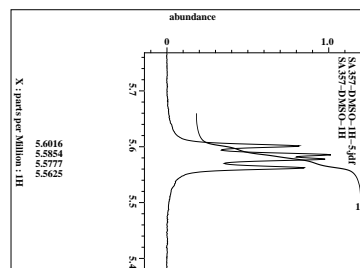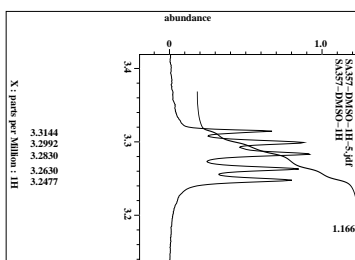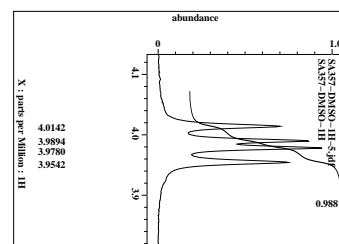

7.7591  
7.7419  
7.5055  
7.4883  
7.3911  
7.3672  
7.3510  
7.2385  
7.1222

5.5854  
5.5777  
5.5625

3.9894  
3.9780  
3.9542

3.2992  
3.2830  
3.2630

2.4688  
2.3697  
2.1466

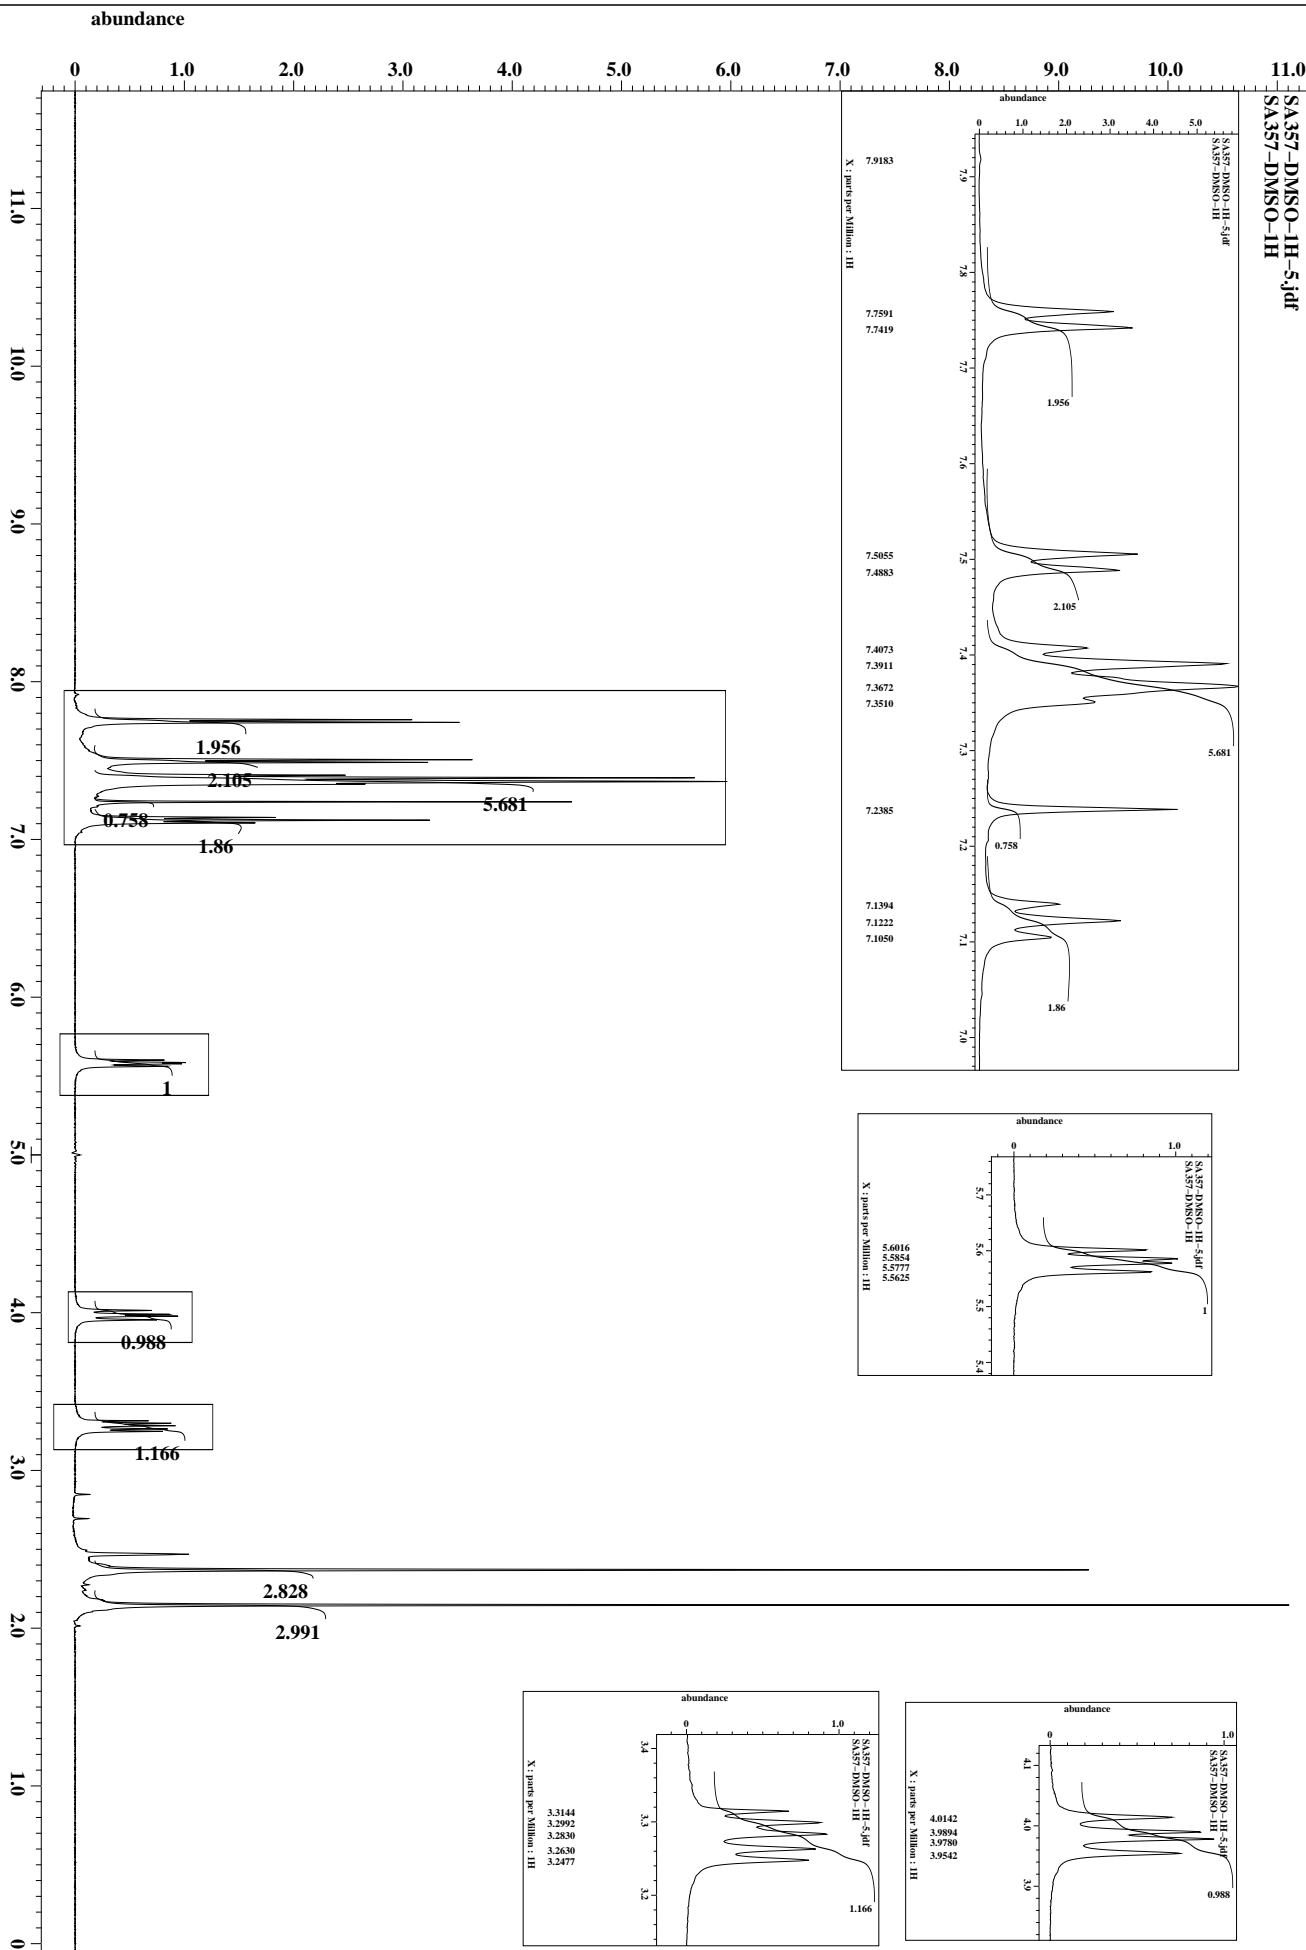

X : parts per Million : 1H

Supplement: s1 [file s1]

SA138-DMSO-13C-4.jdf  
SA138-DMSO-13C

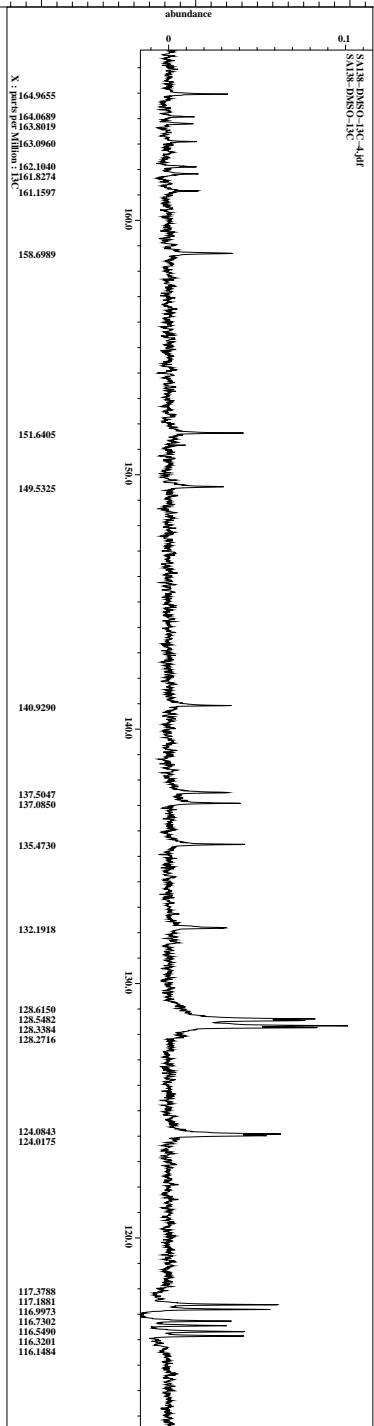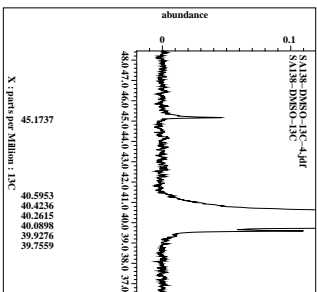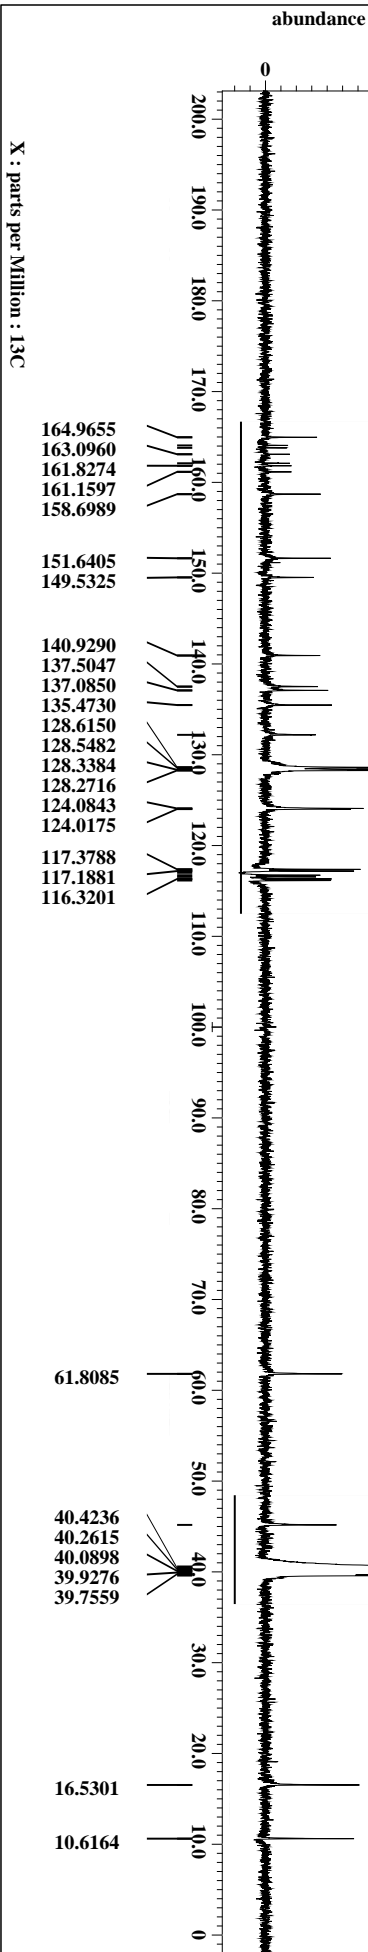

Supplement: s1 [file s1]

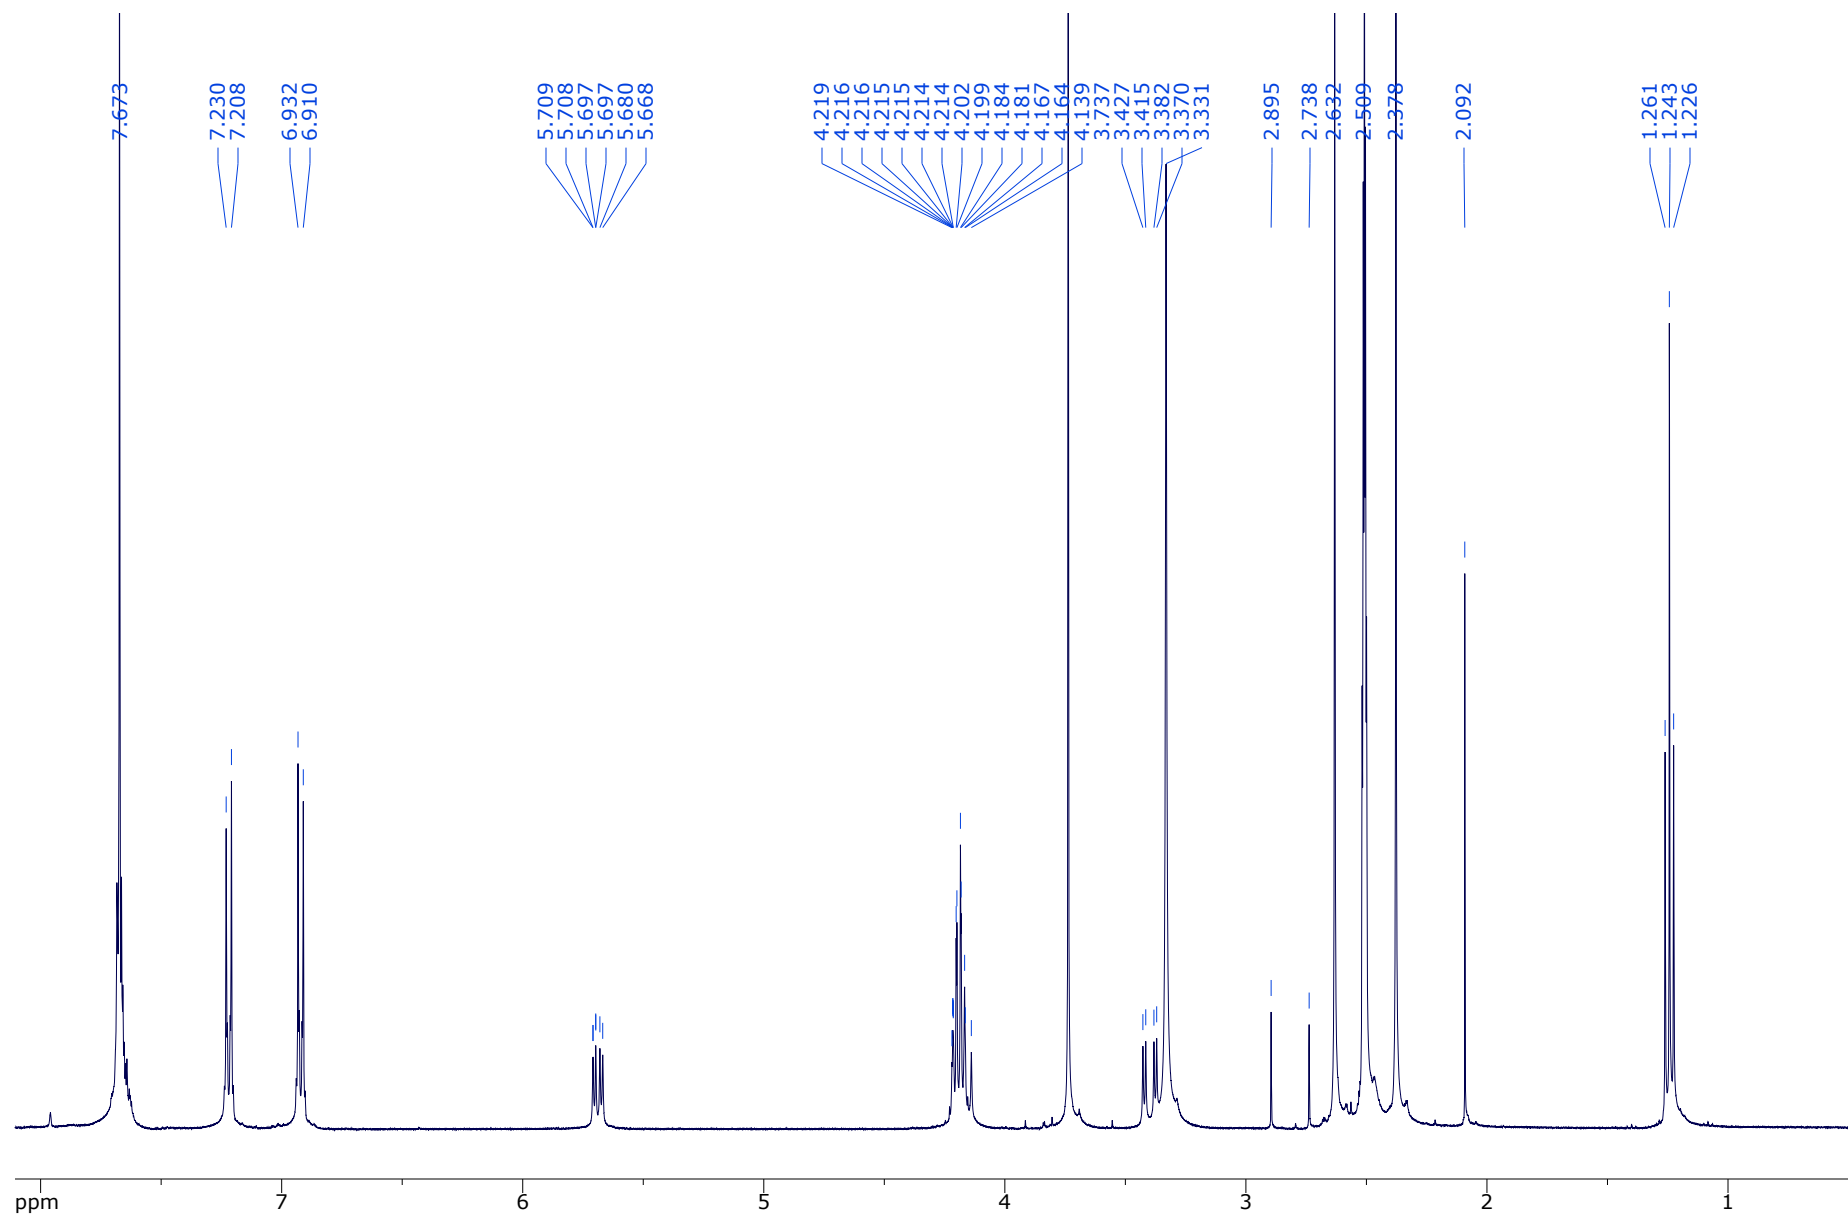

**Fig. S6.** <sup>1</sup>H-NMR spectrum of compound **8** in DMSO-d<sub>6</sub>

Supplement: s1 [file s1]

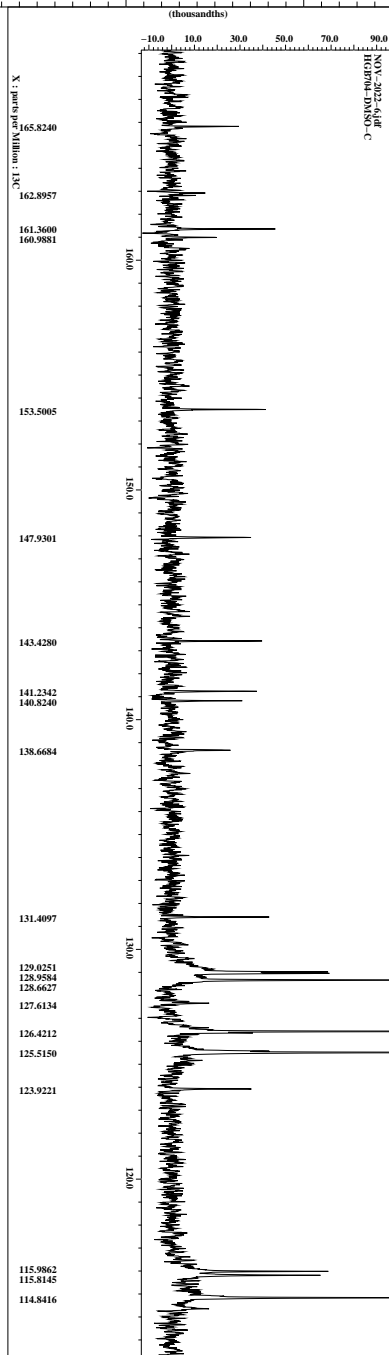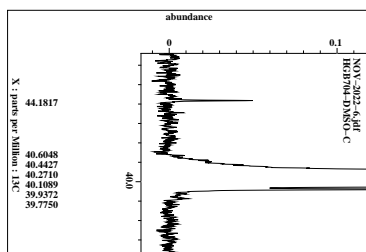

X : parts per Million : 13C

165.8240  
162.8957  
161.3600  
160.9881

153.5005

147.9301

143.4280

141.2342

140.8240

138.6684

131.4097

129.0251

128.9584

128.6627

126.4212

125.5150

115.9862

115.8145

114.8416

105.9233

64.5079

55.8852

40.4427

40.2710

40.1089

39.9372

9.8724

Supplement: s1 [file s1]

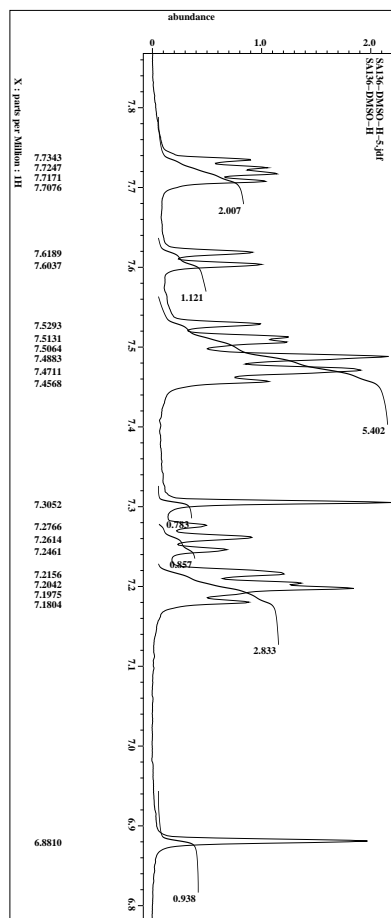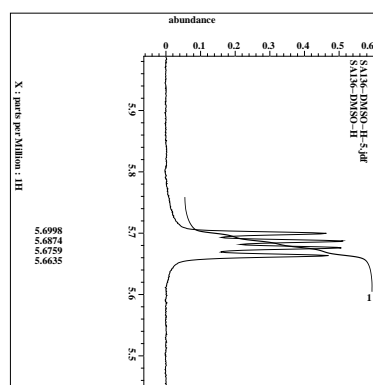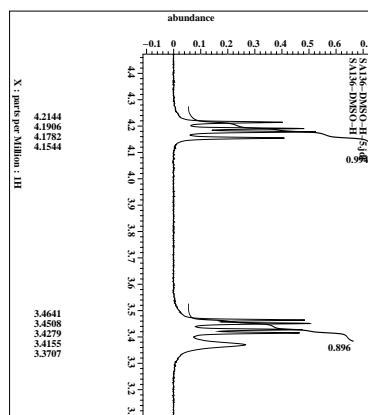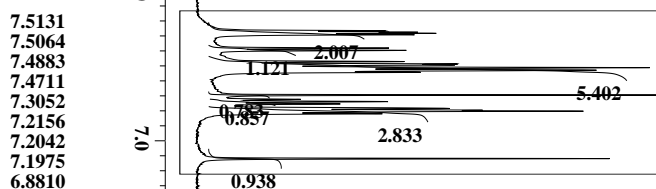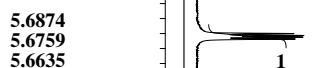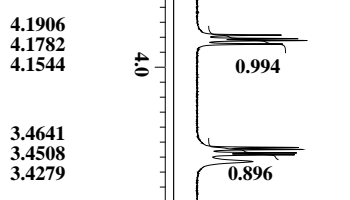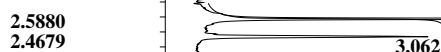

Supplement: s1 [file s1]

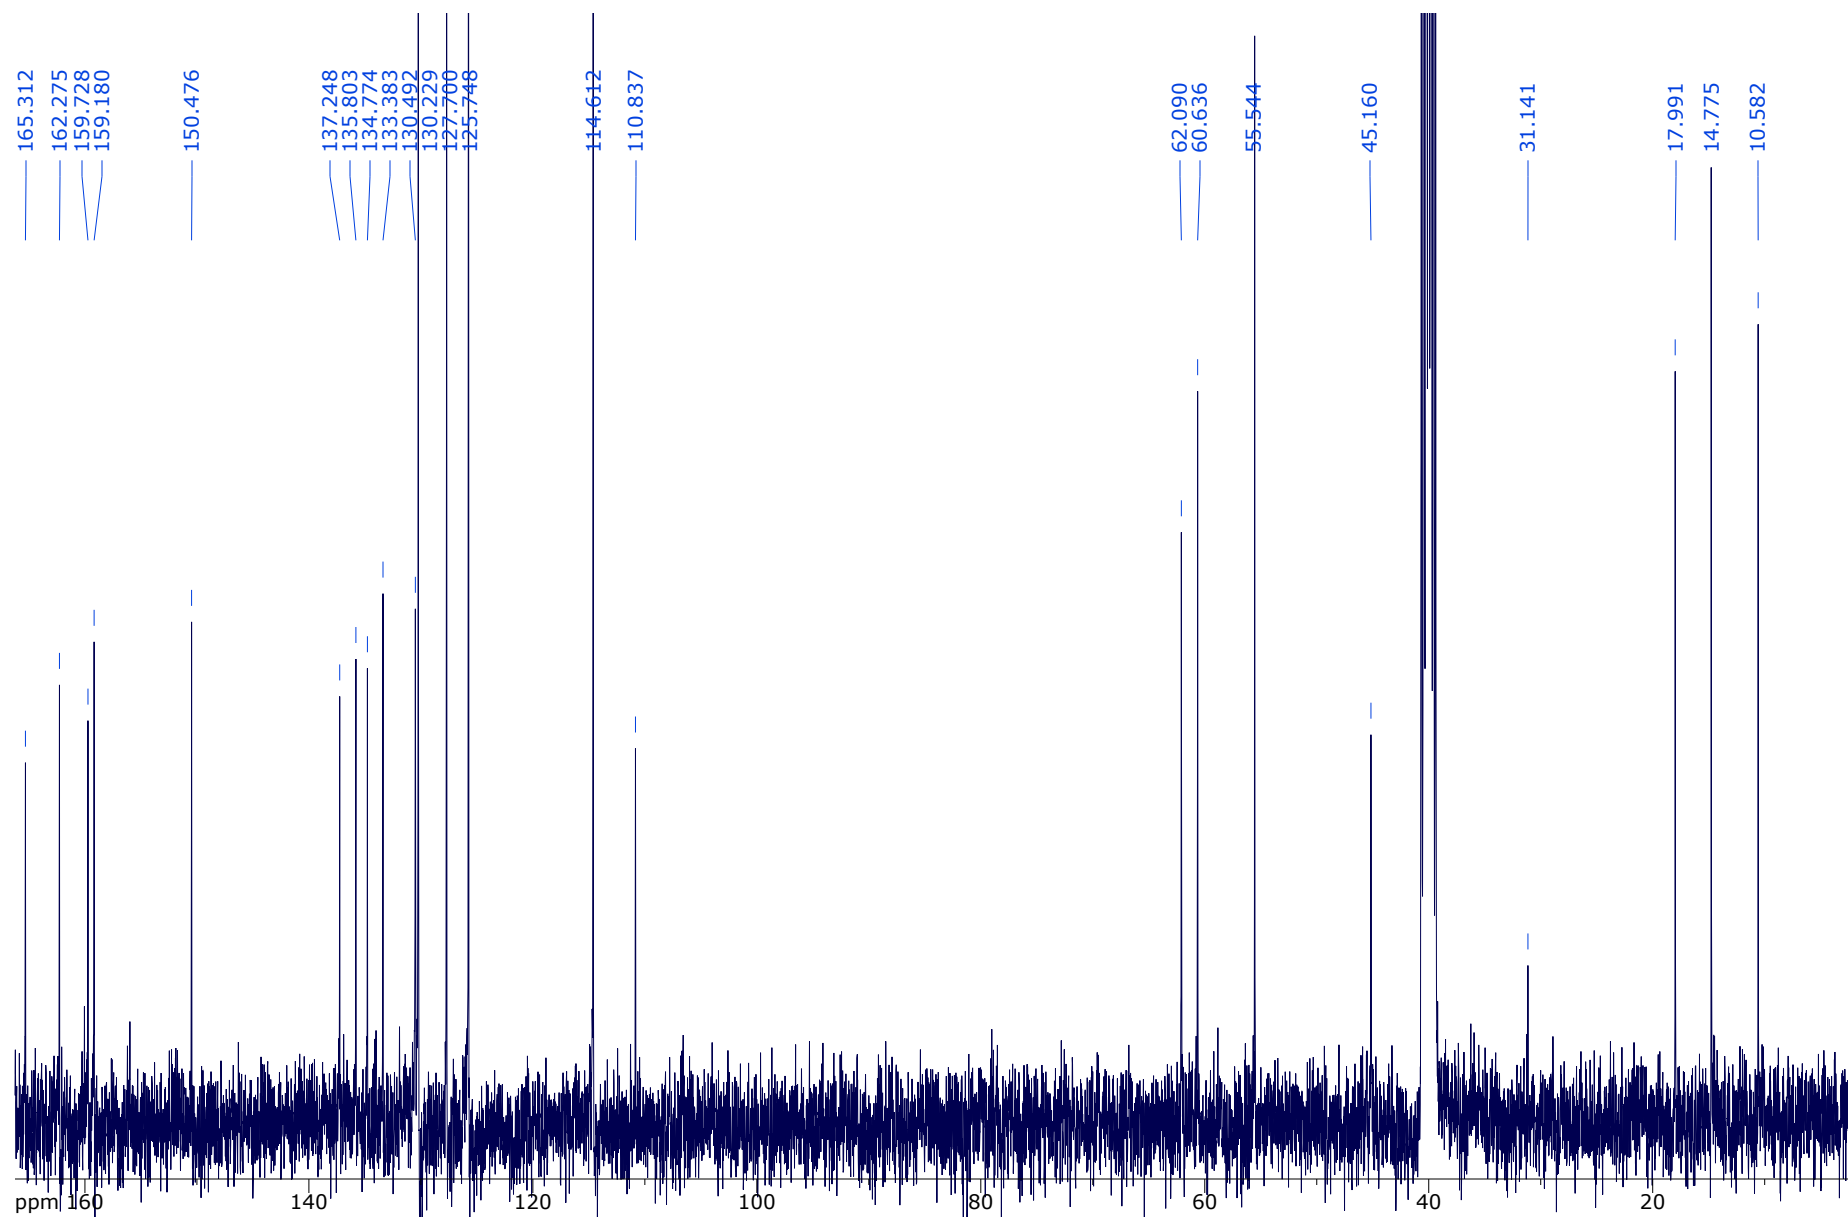

**Fig. S7.** <sup>13</sup>C-NMR spectrum of compound **8** in DMSO-d<sub>6</sub>

Supplement: s1 [file s1]

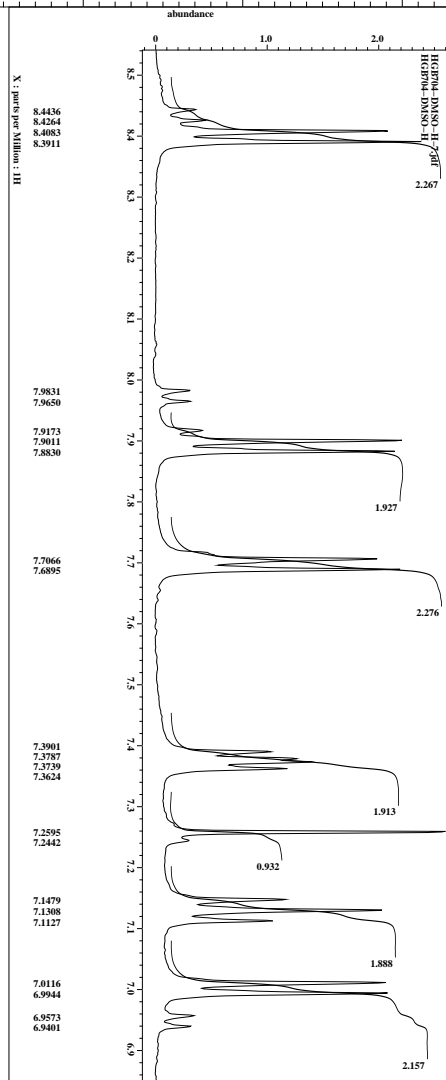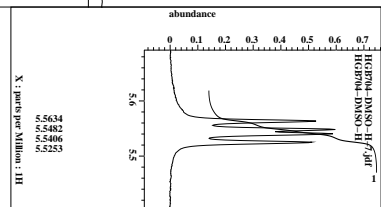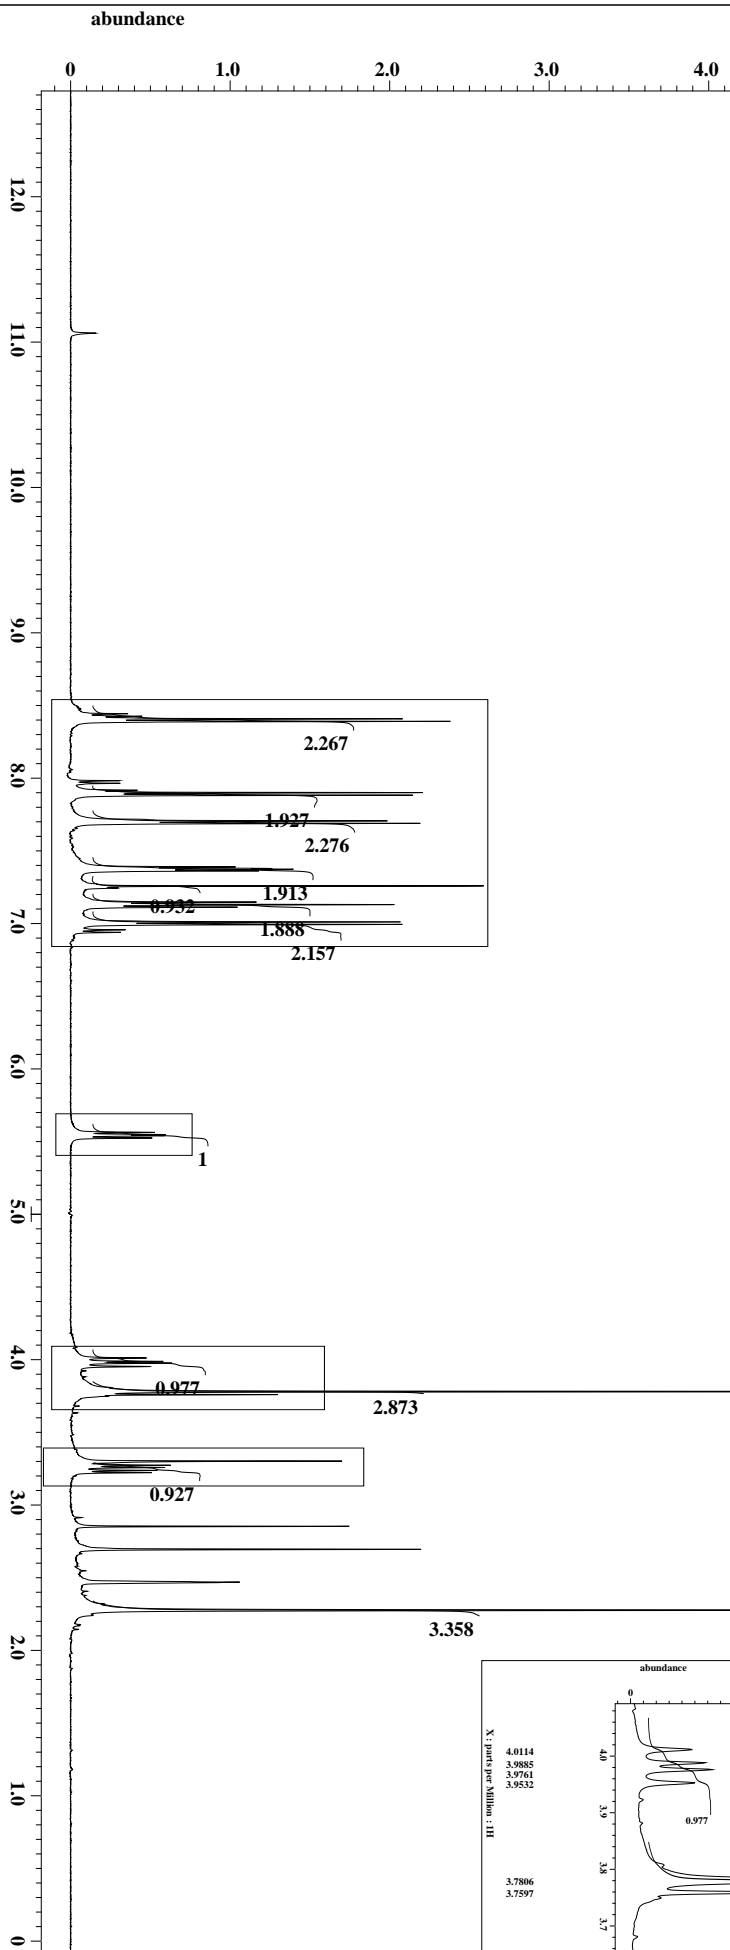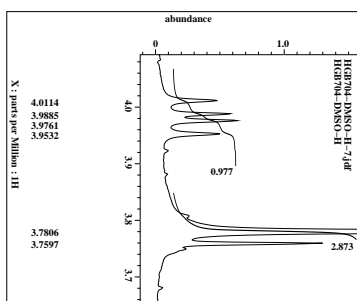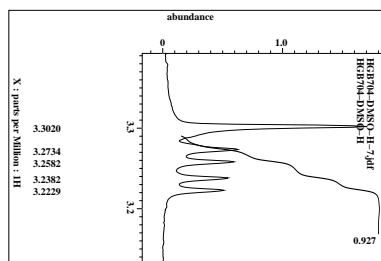

Supplement: s1 [file s1]

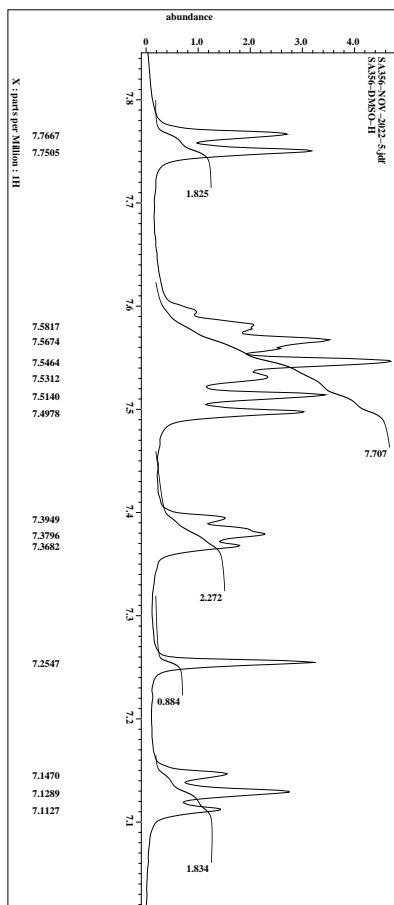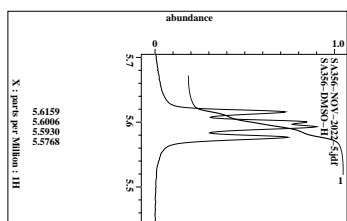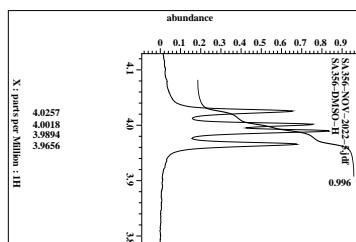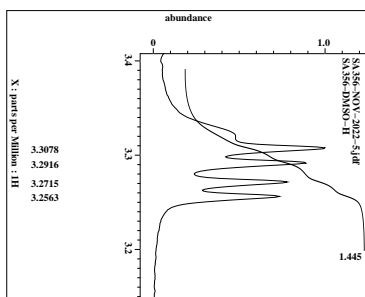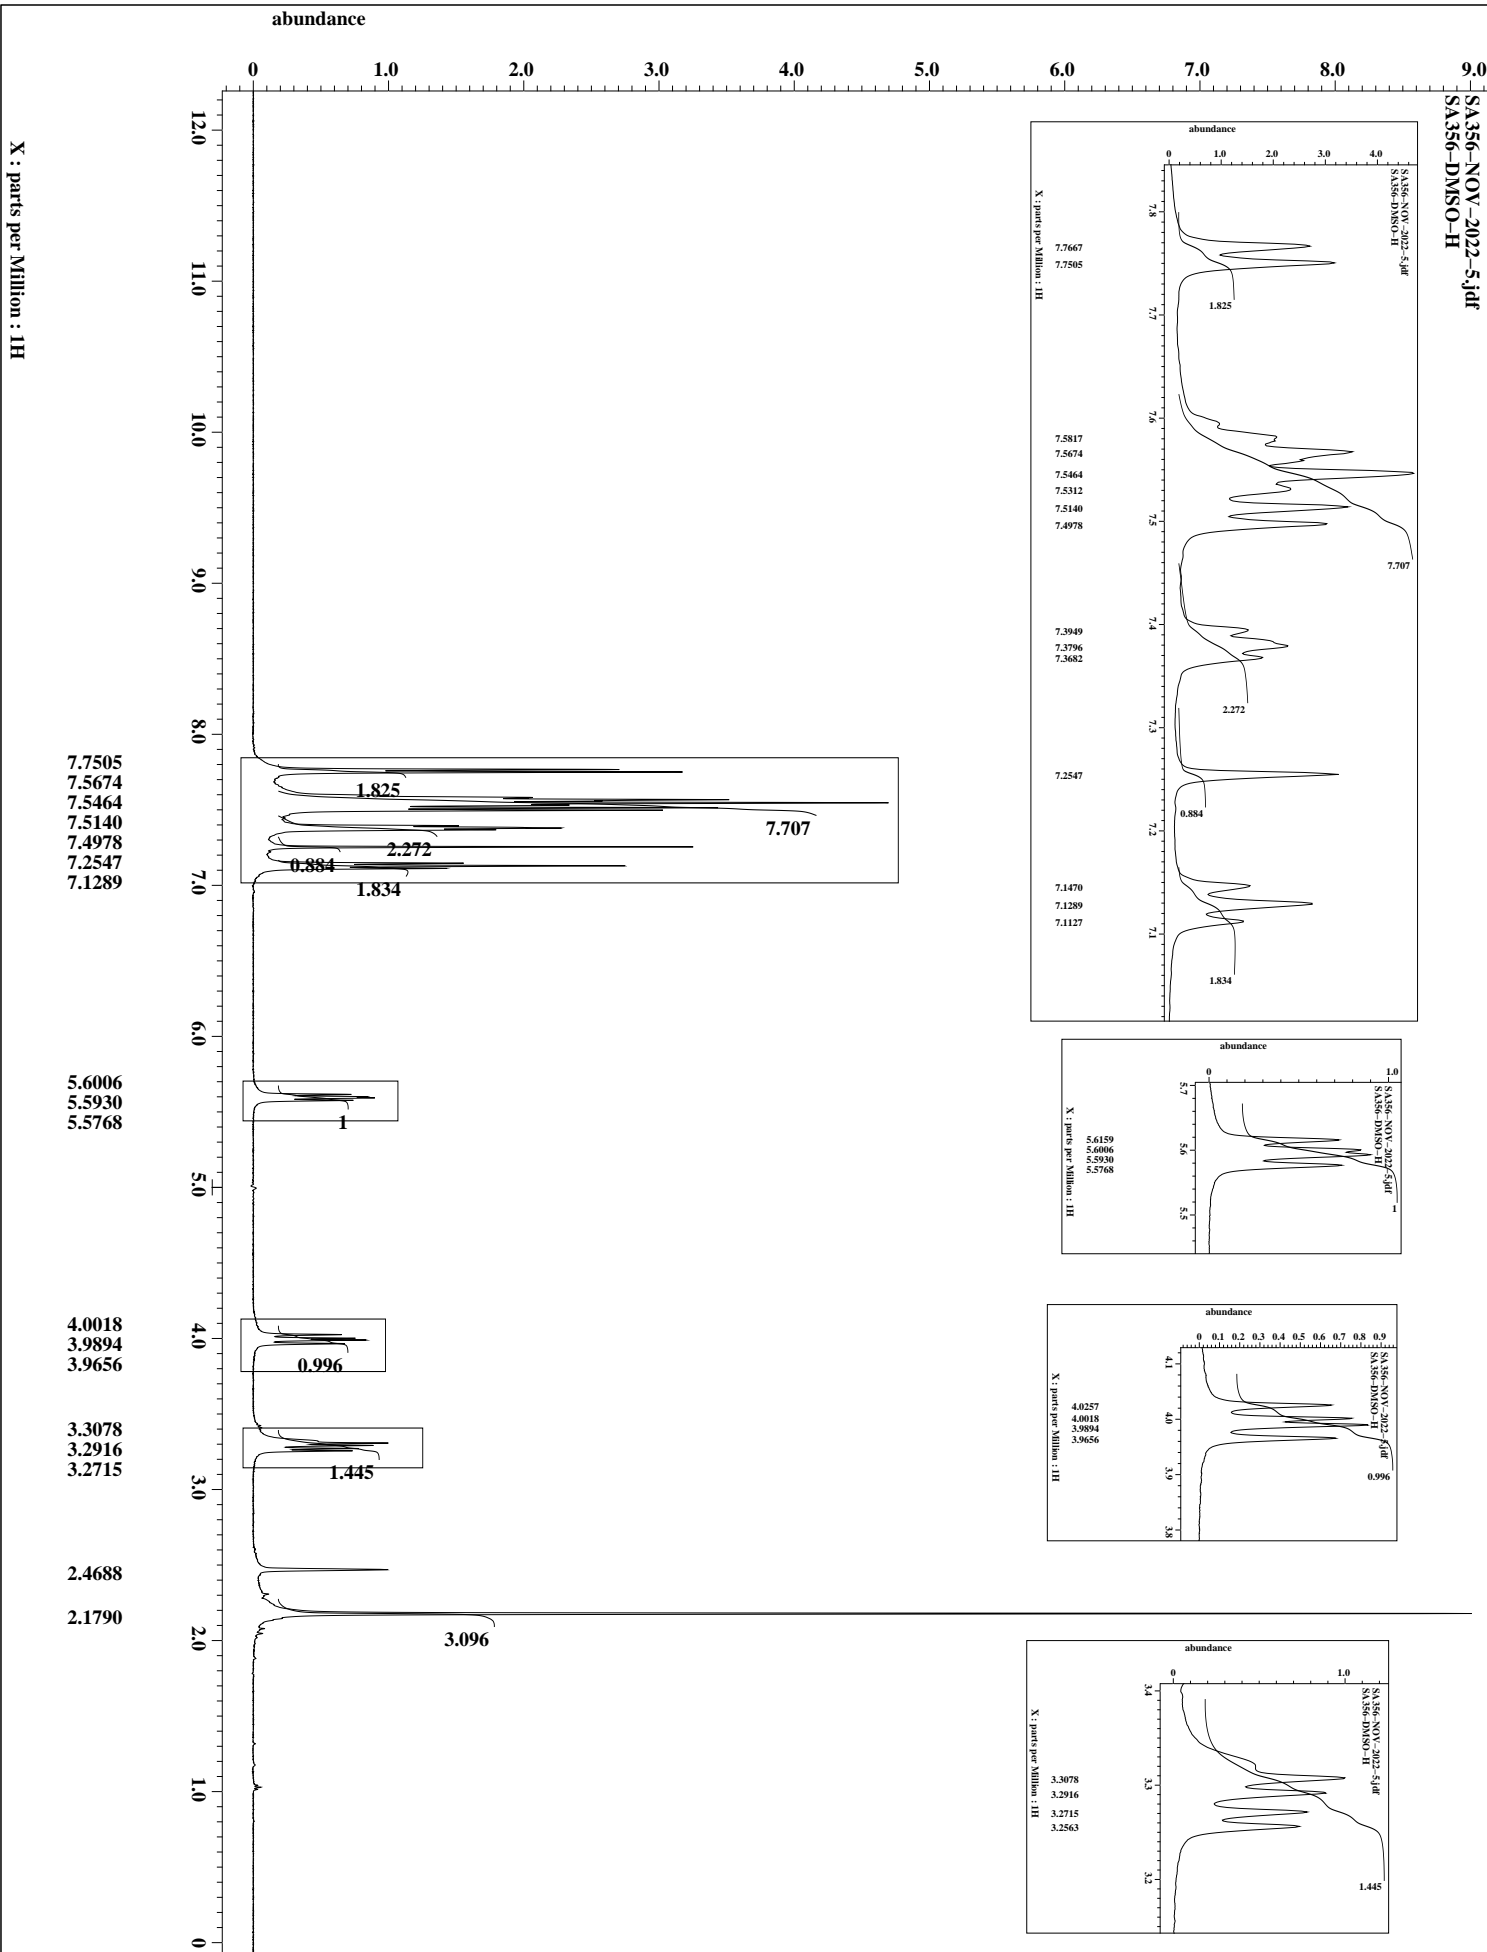

Supplement: s1 [file s1]

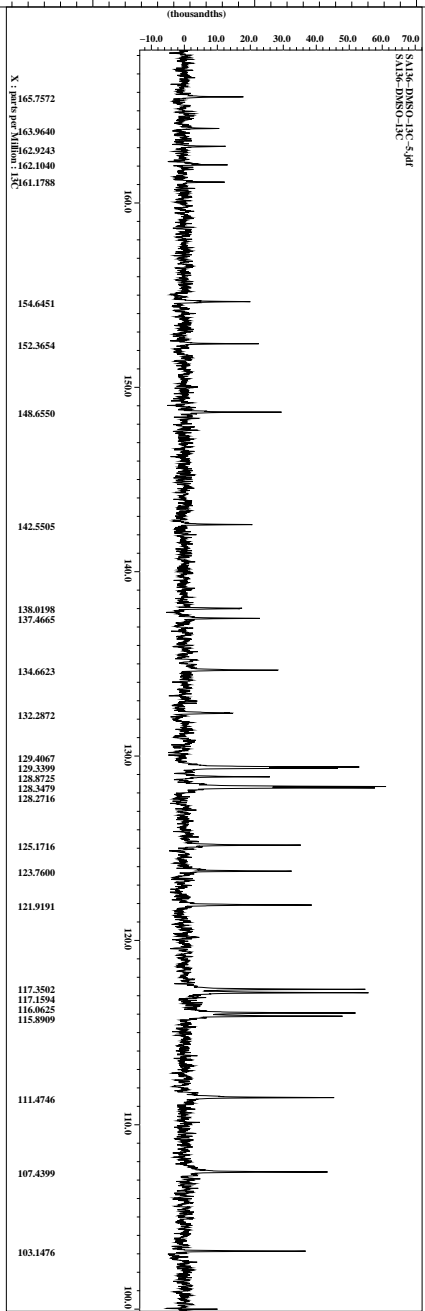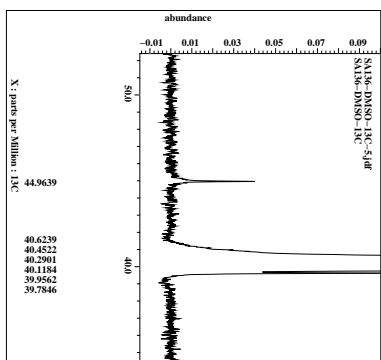

X : parts per Million : 13C

165.7572  
163.9640  
162.9243  
162.1040  
154.6451  
152.3654  
148.6550  
142.5505  
137.4665  
134.6623  
129.4067  
129.3399  
128.8725  
128.3479  
128.2716  
125.1716  
123.7600  
121.9191  
117.3502  
117.1594  
116.0625  
115.8909  
111.4746  
107.4399  
103.1476

63.0008

40.4522  
40.2901  
40.1184  
39.9562

10.4828

Supplement: s1 [file s1]

SA357-DMSO-13C-4.jdf  
M.BEKHEIT/SA357-DMSO-13C

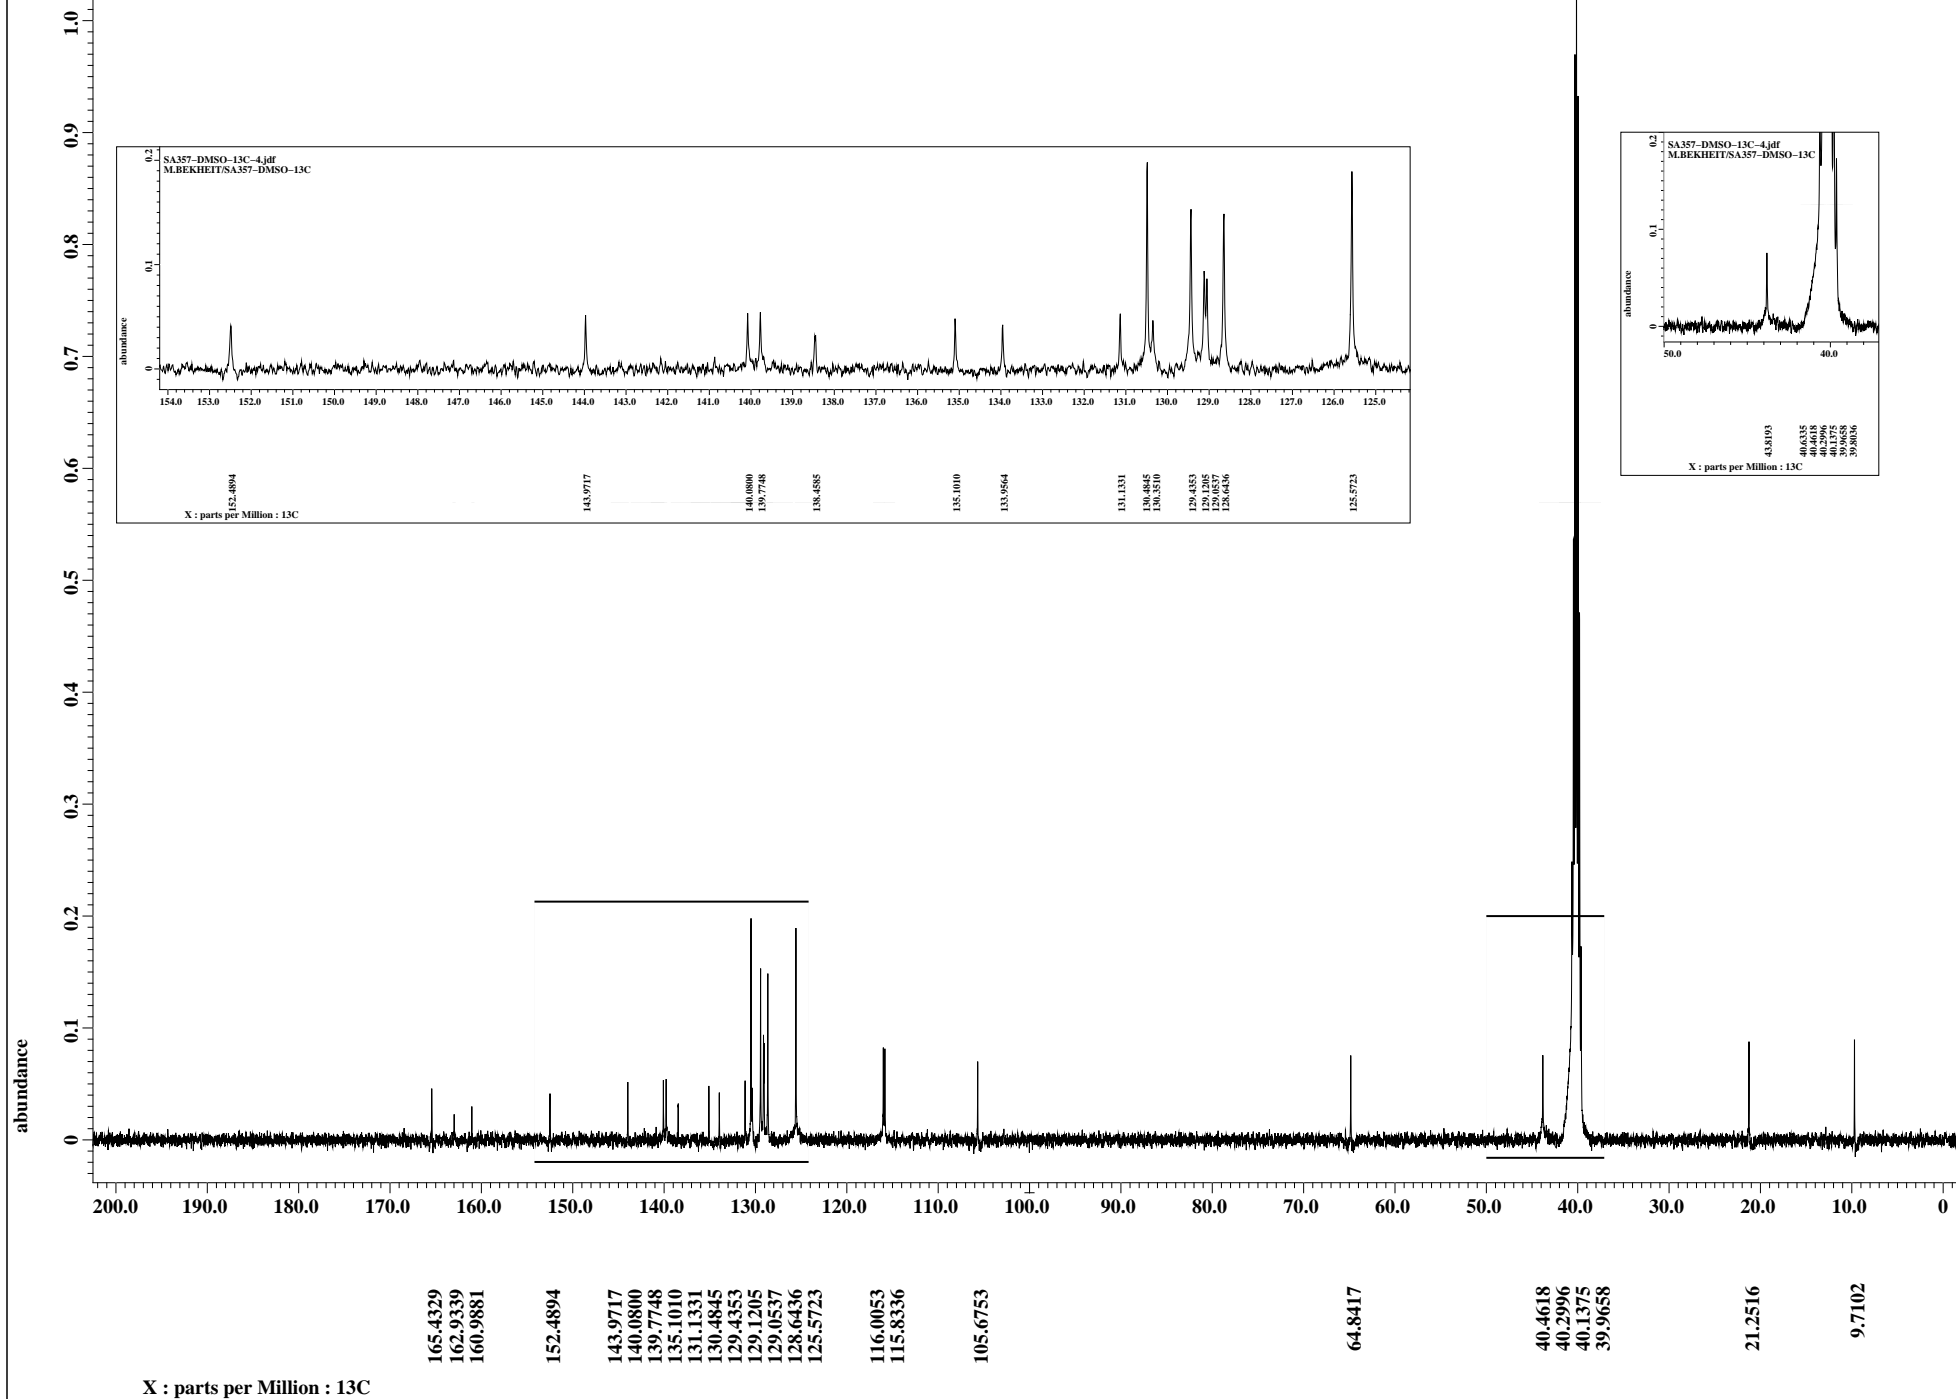

Supplement: s1 [file s1]

HGB84-DMSO-C-3.jdf  
HGB84-DMSO-C

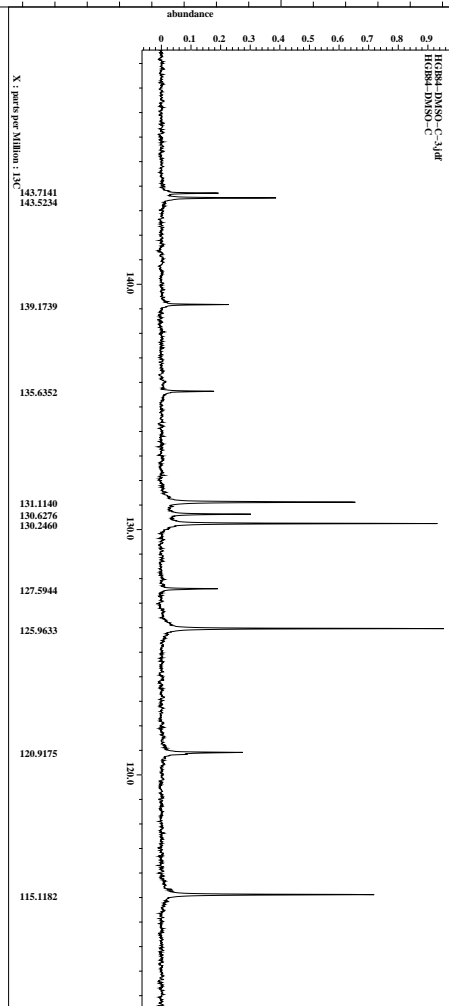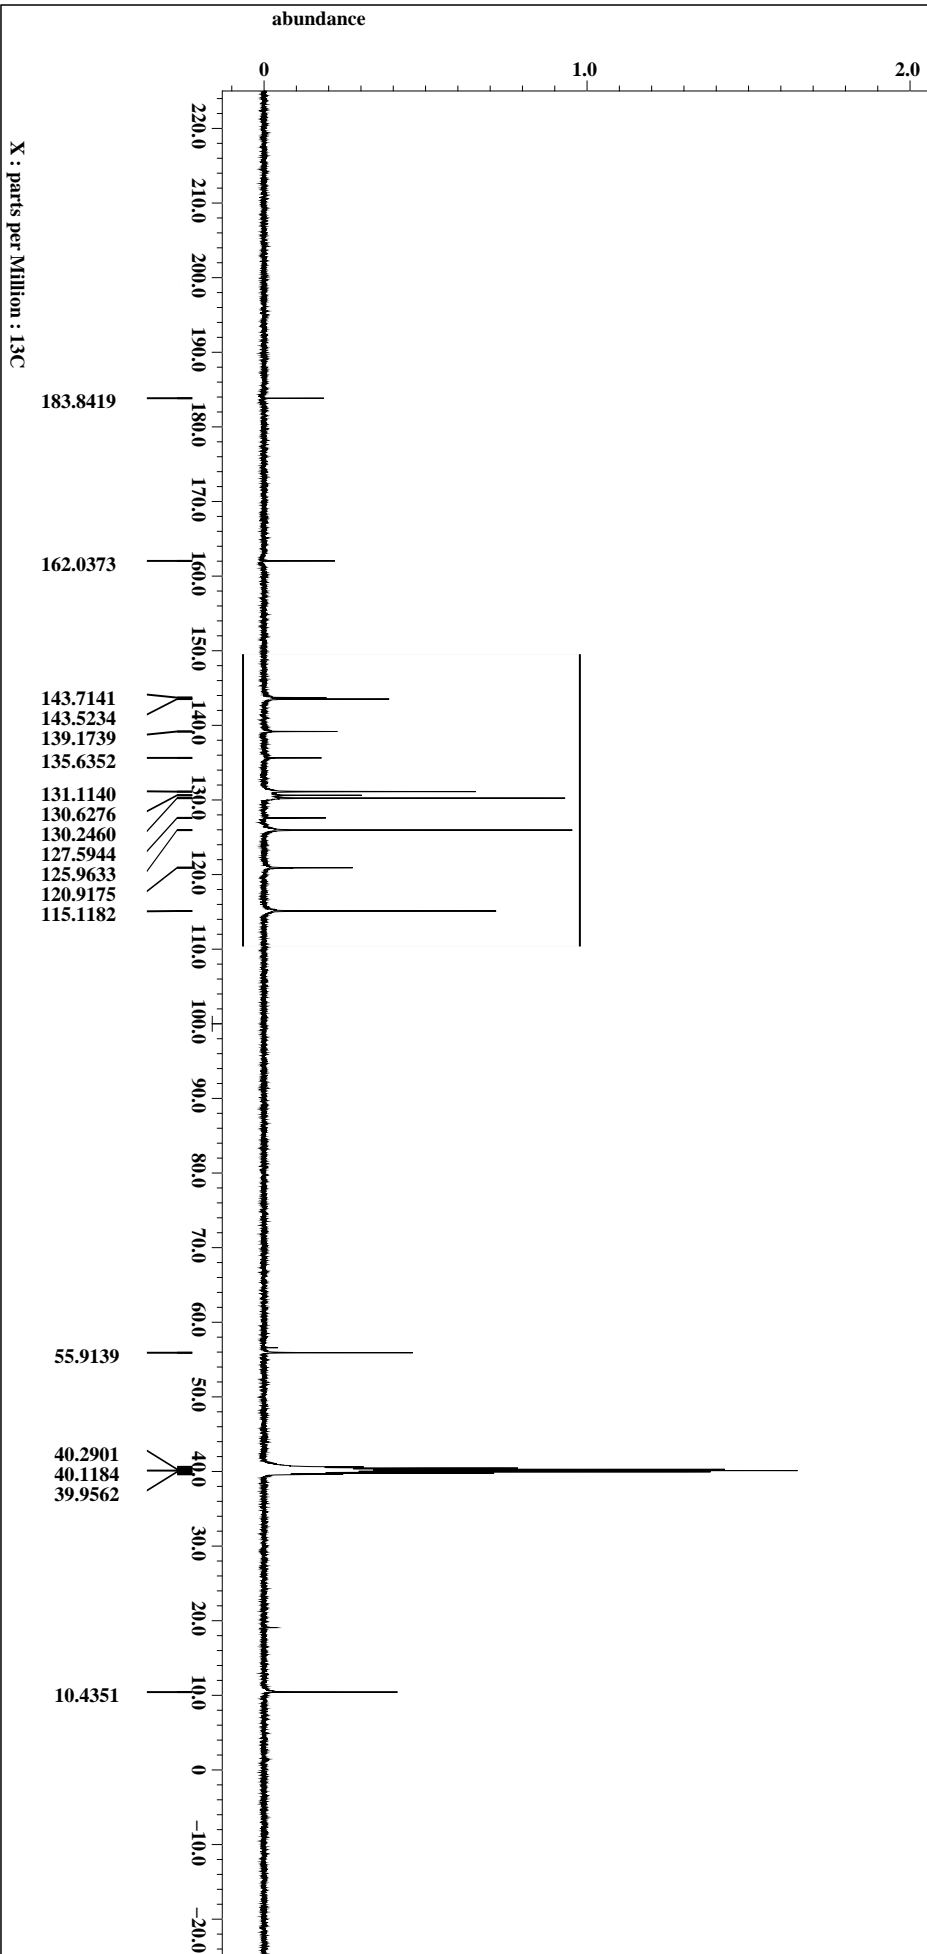

Supplement: s1 [file s1]

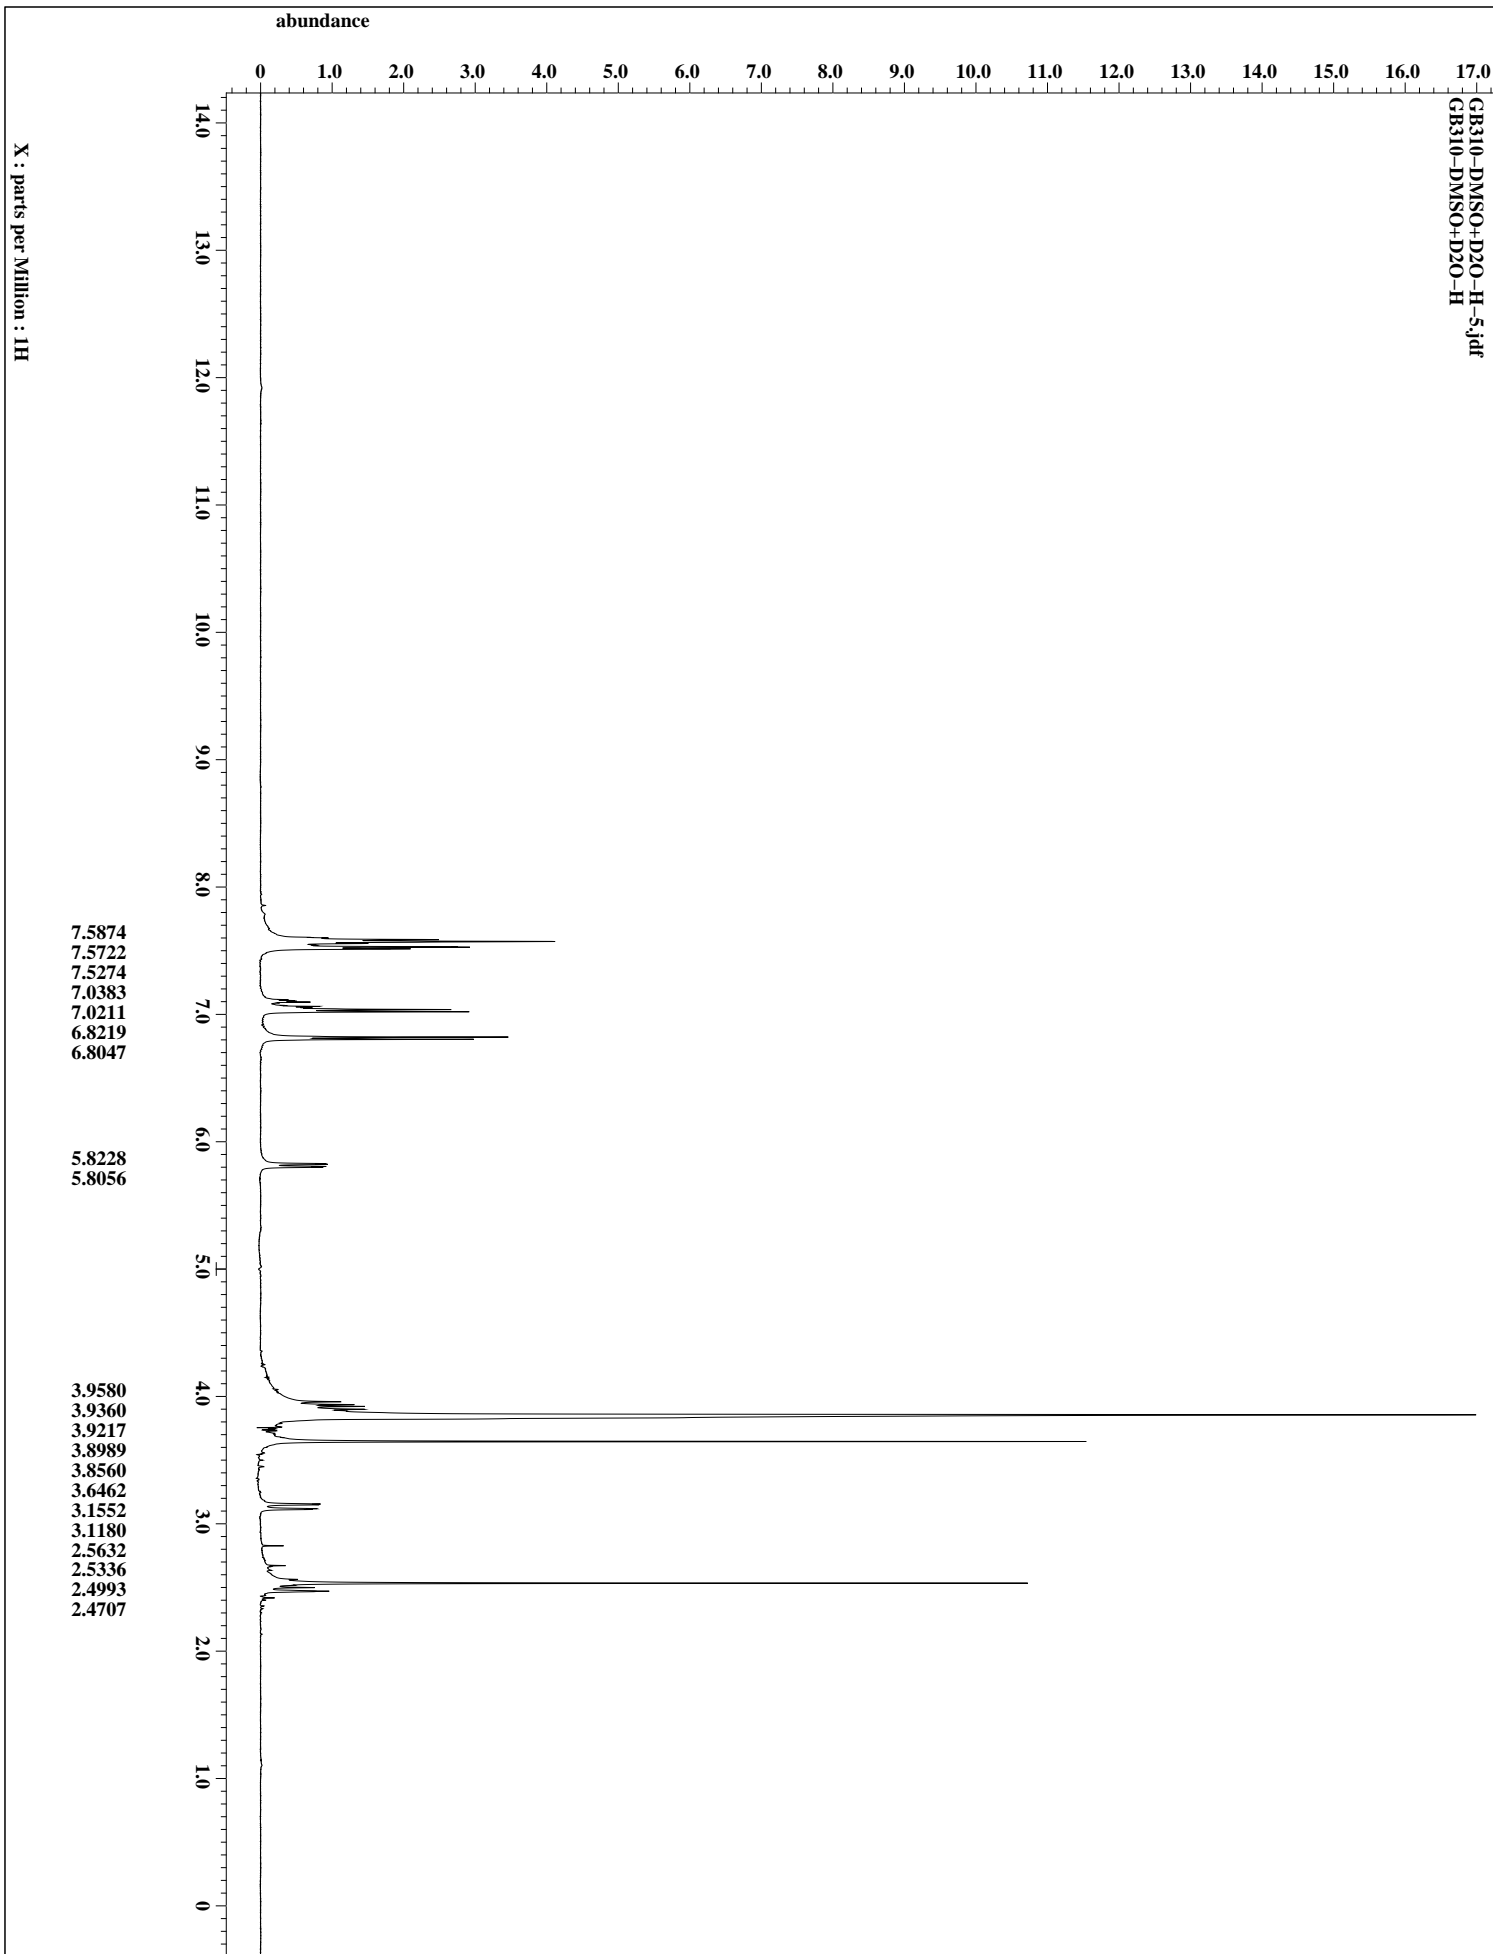

Supplement: s1 [file s1]

GB310-DMSO-13C-3.jdf  
GB310-DMSO-13C

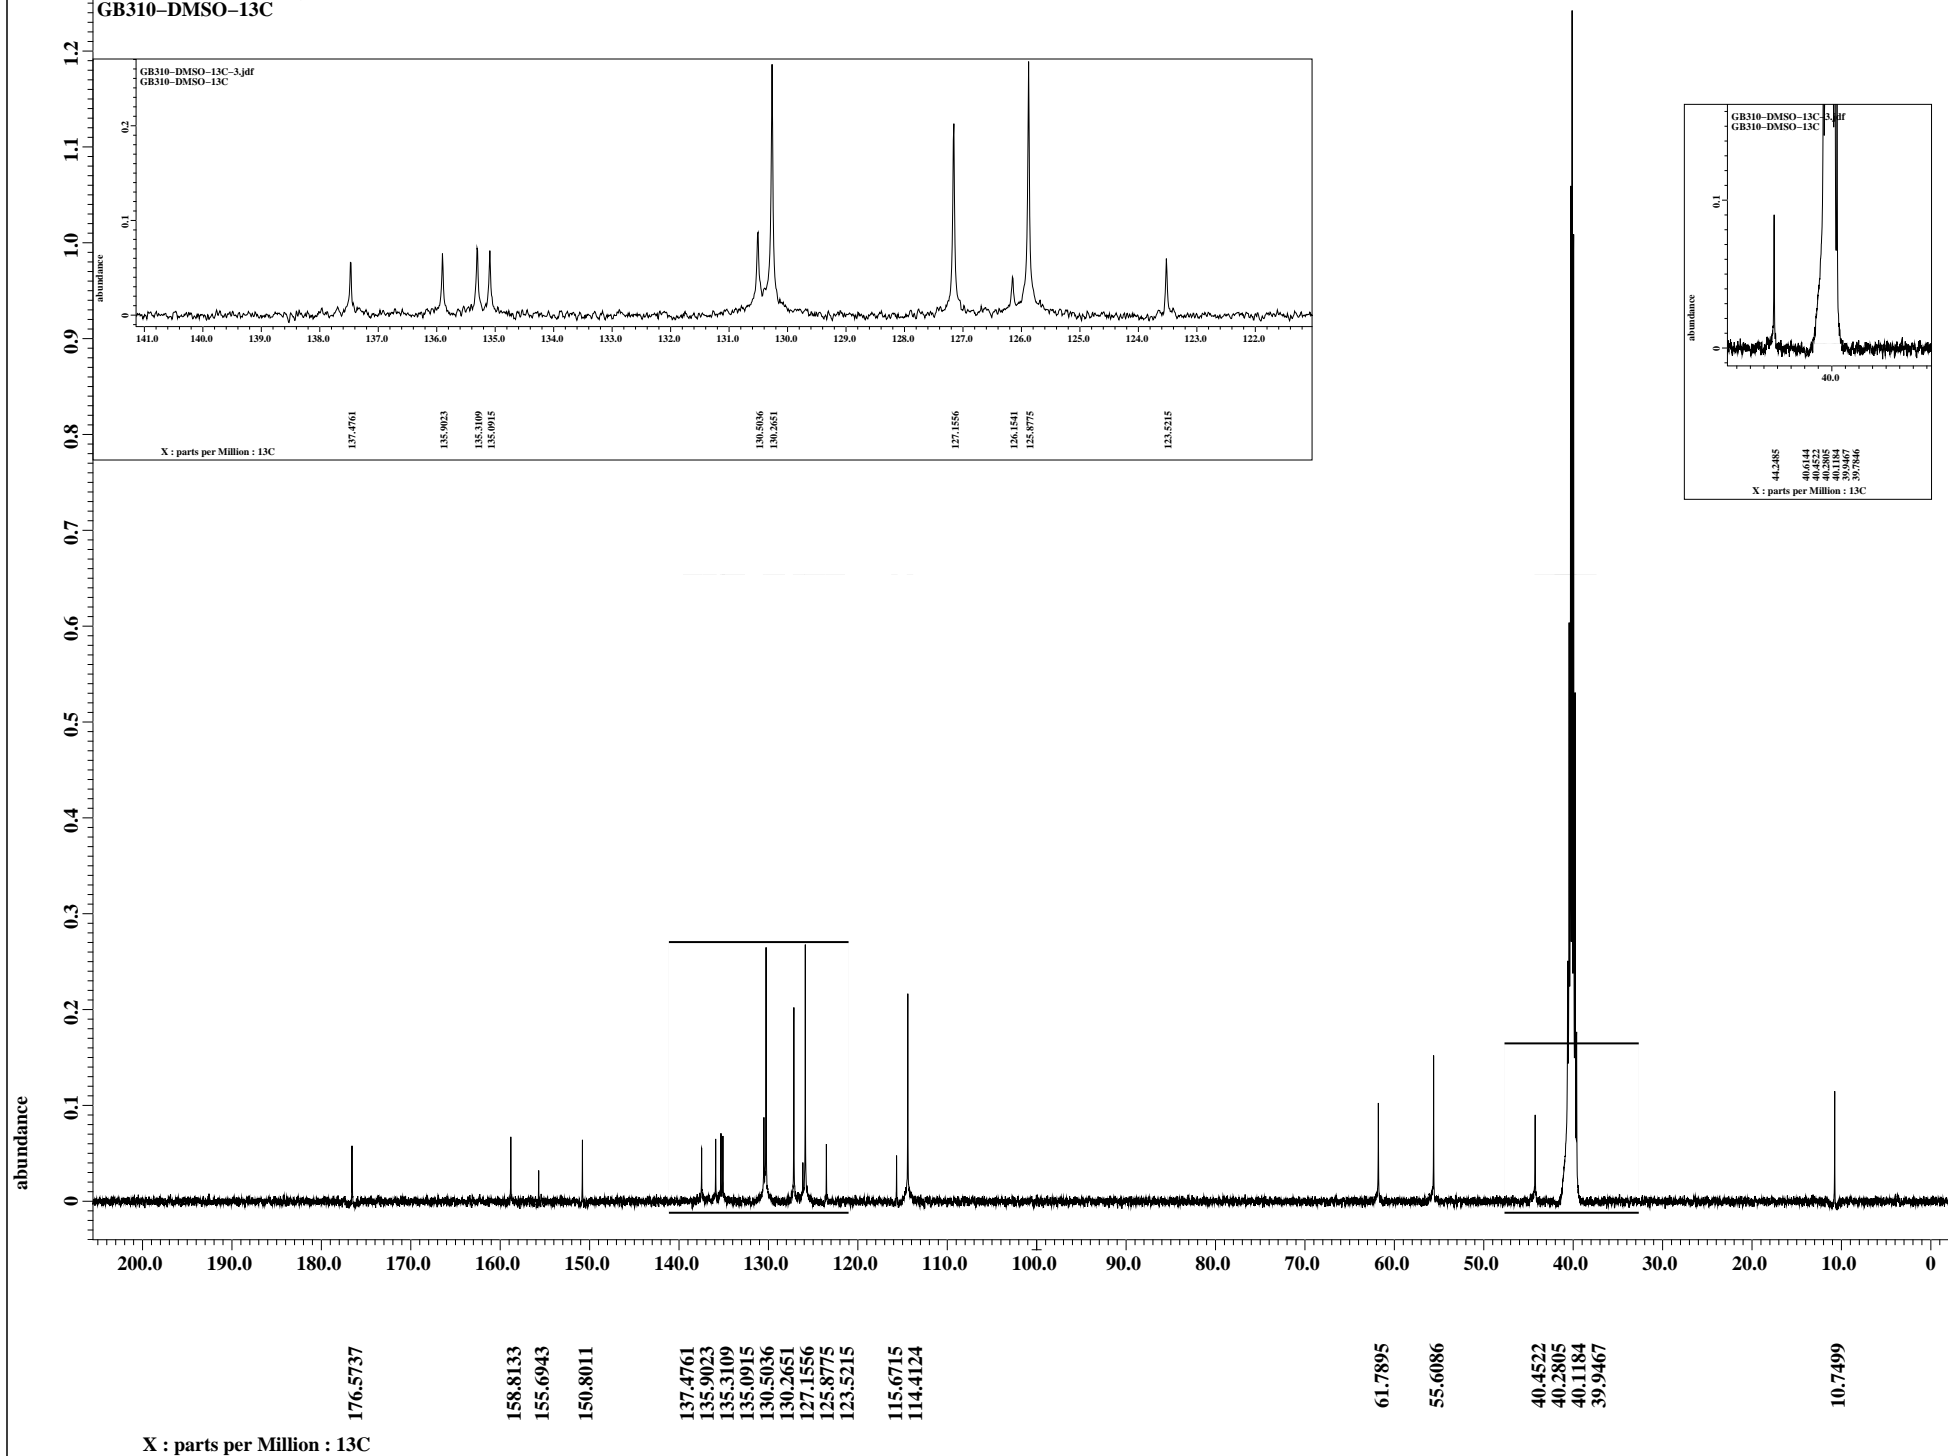

Supplement: s1 [file s1]

SA138-DMSO-1H-5.jdf  
SA138-DMSO-1H

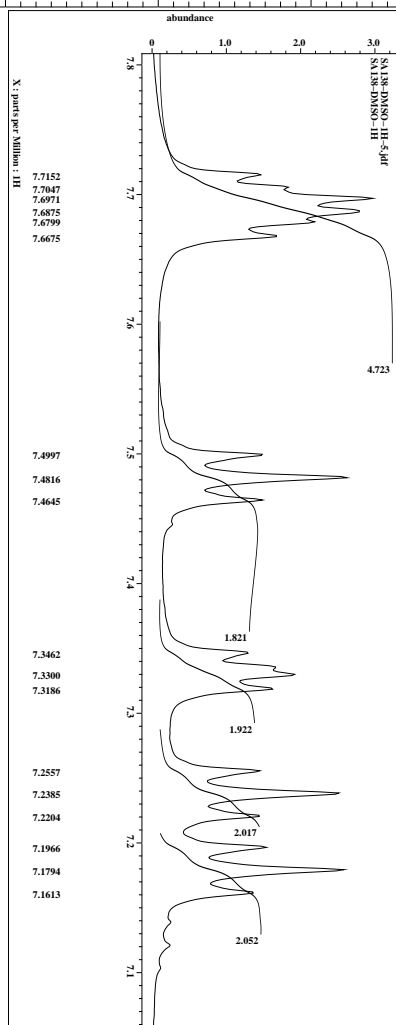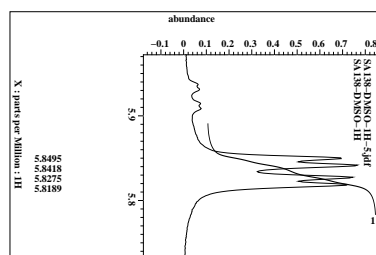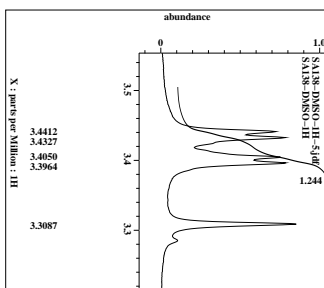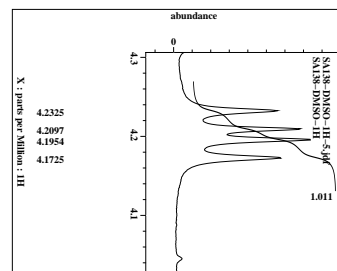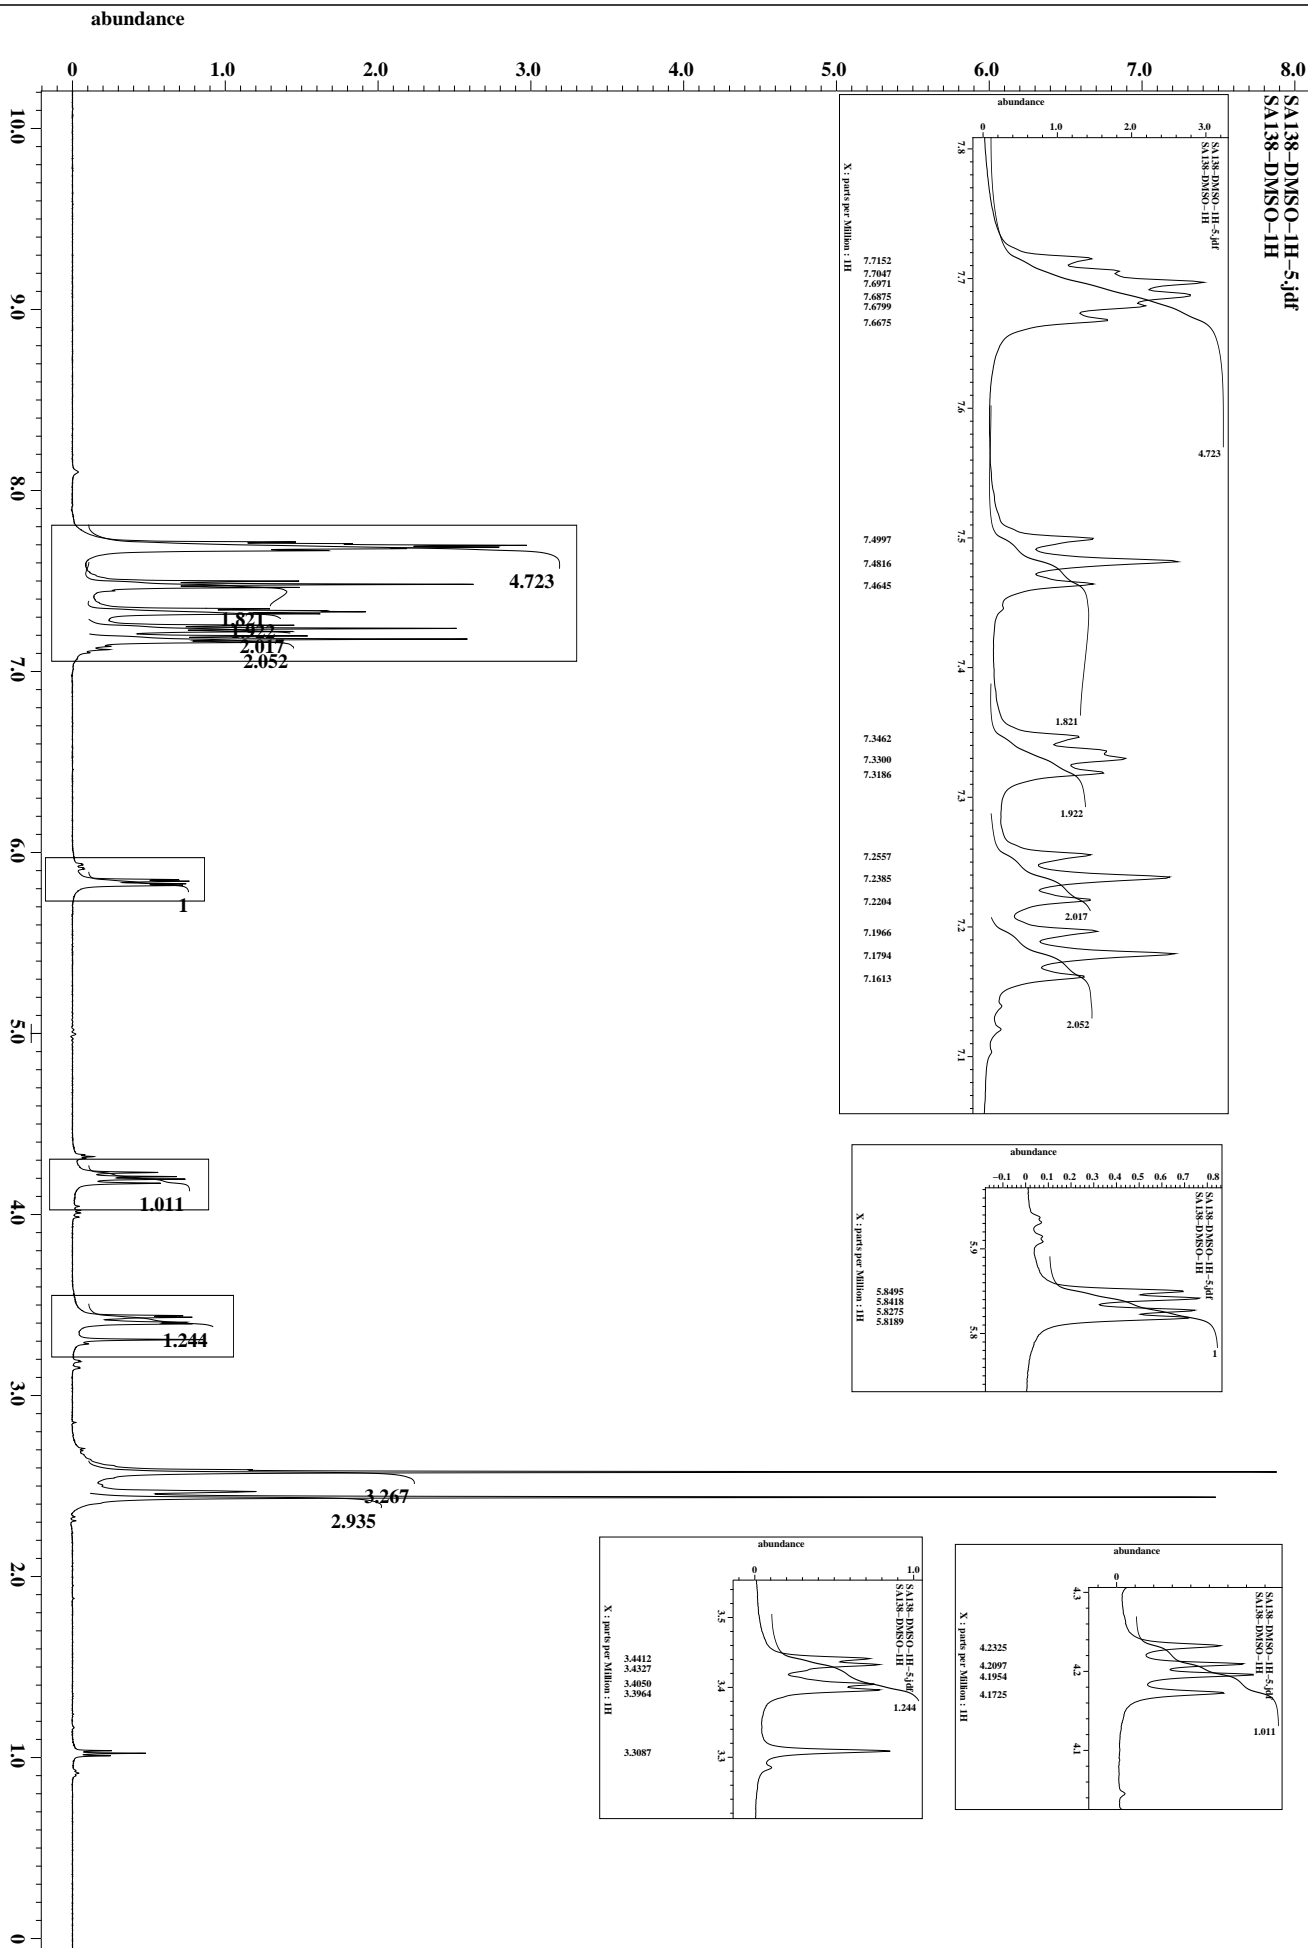

X : parts per Million : 1H

Supplement: s1 [file s1]
